# Supplementary material for: Identifying differentially expressed genes, miRNAs and TFs in major depressive disorder by bioinformatics analysis of next generation sequencing data
Source: Research Square preprint supplement (doi:10.21203/rs.3.rs-6799275/v1), 2025-06-04
Supplement: Supplementary file 1 [file ba20e4f4435ba64aa79ae091.docx]

**Table 1** The statistical metrics for key differentially expressed genes (DEGs)

| **Gene Symbol** | **logFC** | **pValue** | **tvalue** | **Regulation** | **GeneName** |
| --- | --- | --- | --- | --- | --- |
| OR51E2 | 1.959935 | 0.010319 | 2.564962 | Up | olfactory receptor family 51 subfamily E member 2 |
| VN1R2 | 1.849324 | 0.029581 | 2.175653 | Up | vomeronasal 1 receptor 2 |
| CYP2C19 | 1.827552 | 0.017943 | 2.366789 | Up | cytochrome P450 family 2 subfamily C member 19 |
| NFE4 | 1.72556 | 0.042064 | 2.03289 | Up | nuclear factor, erythroid 4 |
| MMP1 | 1.717462 | 0.037673 | 2.078397 | Up | matrix metallopeptidase 1 |
| SERPINA11 | 1.712698 | 0.014791 | 2.43745 | Up | serpin family A member 11 |
| GOLGA6L6 | 1.665369 | 0.020655 | 2.314224 | Up | golgin A6 family like 6 |
| OR10H5 | 1.597893 | 0.045864 | 1.99664 | Up | olfactory receptor family 10 subfamily H member 5 |
| CABP5 | 1.585319 | 0.049819 | 1.961515 | Up | calcium binding protein 5 |
| FGF12-AS3 | 1.56941 | 0.037977 | 2.075105 | Up | FGF12 antisense RNA 3 |
| ZNF705A | 1.532749 | 0.029722 | 2.173771 | Up | zinc finger protein 705A |
| OR2G6 | 1.506874 | 0.038523 | 2.069243 | Up | olfactory receptor family 2 subfamily G member 6 |
| TRBJ2-6 | 1.457949 | 0.046113 | 1.994355 | Up | T cell receptor beta joining 2-6 |
| ZPLD1 | 1.420839 | 0.041702 | 2.036486 | Up | zonapellucida like domain containing 1 |
| HEPHL1 | 1.376614 | 0.019324 | 2.339227 | Up | hephaestin like 1 |
| NAA11 | 1.308298 | 0.02588 | 2.228015 | Up | N-alpha-acetyltransferase 11, NatA catalytic subunit |
| RNVU1-6 | 1.188782 | 0.00293 | 2.975039 | Up | RNA, variant U1 small nuclear 6 |
| AVPR1B | 1.18118 | 0.007453 | 2.675883 | Up | arginine vasopressin receptor 1B |
| SNORD115-16 | 1.161624 | 0.004411 | 2.847192 | Up | small nucleolar RNA, C/D box 115-16 |
| DEFB134 | 1.059418 | 0.03332 | 2.1282 | Up | defensin beta 134 |
| PDE6H | 1.055088 | 0.018802 | 2.349427 | Up | phosphodiesterase 6H |
| AP1M2 | 1.050845 | 0.042265 | 2.030899 | Up | adaptor related protein complex 1 subunit mu 2 |
| C6orf58 | 1.050569 | 0.015319 | 2.424752 | Up | chromosome 6 open reading frame 58 |
| SBSN | 0.960952 | 0.000978 | 3.296658 | Up | suprabasin |
| C10orf95 | 0.937903 | 0.001917 | 3.10273 | Up | chromosome 10 open reading frame 95 |
| STARD6 | 0.888251 | 0.007909 | 2.655943 | Up | StAR related lipid transfer domain containing 6 |
| OTOL1 | 0.84958 | 0.034831 | 2.110322 | Up | otolin 1 |
| NPPA | 0.83306 | 0.004879 | 2.814887 | Up | natriuretic peptide A |
| TPPP2 | 0.808303 | 0.023995 | 2.257208 | Up | tubulin polymerization promoting protein family member 2 |
| TJP3 | 0.795065 | 0.000358 | 3.569529 | Up | tight junction protein 3 |
| SNORD115-34 | 0.767658 | 0.040974 | 2.04379 | Up | small nucleolar RNA, C/D box 115-34 |
| ADAM21 | 0.763216 | 0.033113 | 2.130716 | Up | ADAM metallopeptidase domain 21 |
| CASC18 | 0.751216 | 0.014378 | 2.447671 | Up | cancer susceptibility 18 |
| EREG | 0.746065 | 0.032861 | 2.133776 | Up | epiregulin |
| TBC1D28 | 0.720229 | 0.045746 | 1.997729 | Up | TBC1 domain family member 28 |
| CYP2C18 | 0.704776 | 0.005171 | 2.796177 | Up | cytochrome P450 family 2 subfamily C member 18 |
| SPATA31C1 | 0.702021 | 0.042404 | 2.029538 | Up | SPATA31 subfamily C member 1 |
| NRAP | 0.695476 | 0.004378 | 2.849558 | Up | nebulin related anchoring protein |
| NEK2 | 0.689389 | 0.003914 | 2.885046 | Up | NIMA related kinase 2 |
| GUCY2C | 0.674353 | 0.046684 | 1.989157 | Up | guanylatecyclase 2C |
| CARTPT | 0.671315 | 0.047527 | 1.981571 | Up | CART prepropeptide |
| PIK3C2G | 0.668182 | 0.010276 | 2.566384 | Up | phosphatidylinositol-4-phosphate 3-kinase catalytic subunit type 2 gamma |
| CLDN34 | 0.657202 | 0.009823 | 2.582004 | Up | claudin 34 |
| CAPN12 | 0.620178 | 0.010137 | 2.571113 | Up | calpain 12 |
| KRT81 | 0.615539 | 0.030984 | 2.157281 | Up | keratin 81 |
| CUX2 | 0.612238 | 0.017889 | 2.367903 | Up | cut like homeobox 2 |
| CCIN | 0.597013 | 0.003803 | 2.894081 | Up | calicin |
| GPR26 | 0.596787 | 0.000455 | 3.505774 | Up | G protein-coupled receptor 26 |
| FBLN7 | 0.590237 | 0.003202 | 2.947696 | Up | fibulin 7 |
| PAX5 | 0.589686 | 0.046857 | 1.987594 | Up | paired box 5 |
| RNU1-1 | 0.586561 | 0.044146 | 2.012706 | Up | RNA, U1 small nuclear 1 |
| ONECUT1 | 0.582362 | 0.016093 | 2.406805 | Up | one cut homeobox 1 |
| DES | 0.57879 | 0.026775 | 2.214779 | Up | desmin |
| SLCO2A1 | 0.566143 | 0.004571 | 2.835782 | Up | solute carrier organic anion transporter family member 2A1 |
| EFCC1 | 0.558295 | 0.010305 | 2.565412 | Up | EF-hand and coiled-coil domain containing 1 |
| PTGER3 | 0.55324 | 0.007237 | 2.685752 | Up | prostaglandin E receptor 3 |
| TMEM52B | 0.553146 | 0.011732 | 2.520113 | Up | transmembrane protein 52B |
| C6orf141 | 0.548329 | 0.007098 | 2.69221 | Up | chromosome 6 open reading frame 141 |
| RHOA-IT1 | 0.54549 | 0.021719 | 2.295254 | Up | RHOA intronic transcript 1 |
| OR3A2 | 0.536041 | 0.010185 | 2.569495 | Up | olfactory receptor family 3 subfamily A member 2 |
| SNORD115-1 | 0.533349 | 0.029055 | 2.182742 | Up | small nucleolar RNA, C/D box 115-1 |
| ADAMTS20 | 0.531067 | 0.035546 | 2.102082 | Up | ADAM metallopeptidase with thrombospondin type 1 motif 20 |
| ABCA4 | 0.513885 | 0.034061 | 2.119353 | Up | ATP binding cassette subfamily A member 4 |
| ERICH6B | 0.50715 | 0.009951 | 2.577521 | Up | glutamate rich 6B |
| ETV4 | 0.50228 | 0.031814 | 2.146738 | Up | ETS variant transcription factor 4 |
| EPHA1 | 0.501795 | 0.0368 | 2.087975 | Up | EPH receptor A1 |
| HSPB3 | 0.500388 | 0.01129 | 2.533582 | Up | heat shock protein family B (small) member 3 |
| ASCL2 | 0.500156 | 0.038088 | 2.073907 | Up | achaete-scute family bHLH transcription factor 2 |
| COL22A1 | 0.497732 | 0.003566 | 2.914169 | Up | collagen type XXII alpha 1 chain |
| SNORA31 | 0.488103 | 0.003353 | 2.933381 | Up | small nucleolar RNA, H/ACA box 31 |
| DLGAP1-AS4 | 0.474354 | 0.02831 | 2.19297 | Up | DLGAP1 antisense RNA 4 |
| MAEL | 0.468609 | 0.015429 | 2.422144 | Up | maelstrom spermatogenic transposon silencer |
| ULBP2 | 0.463016 | 0.011777 | 2.518768 | Up | UL16 binding protein 2 |
| ERFE | 0.45275 | 0.005756 | 2.761378 | Up | erythroferrone |
| CACNA1S | 0.449509 | 0.005839 | 2.756692 | Up | calcium voltage-gated channel subunit alpha1 S |
| ARHGAP10 | 0.448318 | 0.0021 | 3.075677 | Up | Rho GTPase activating protein 10 |
| ARL9 | 0.434878 | 0.03044 | 2.164315 | Up | ARF like GTPase 9 |
| BTNL9 | 0.4312 | 0.034848 | 2.110119 | Up | butyrophilin like 9 |
| NWD2 | 0.426818 | 0.008339 | 2.638034 | Up | NACHT and WD repeat domain containing 2 |
| NPIPB11 | 0.425555 | 0.033861 | 2.121721 | Up | nuclear pore complex interacting protein family member B11 |
| RASL11B | 0.417708 | 0.018952 | 2.346469 | Up | RAS like family 11 member B |
| SERTM1 | 0.400318 | 0.005085 | 2.801583 | Up | serine rich and transmembrane domain containing 1 |
| DHDH | 0.396932 | 0.031736 | 2.147718 | Up | dihydrodiol dehydrogenase |
| NPR3 | 0.387752 | 0.01985 | 2.329163 | Up | natriuretic peptide receptor 3 |
| STYK1 | 0.383172 | 0.00255 | 3.017292 | Up | serine/threonine/tyrosine kinase 1 |
| MCHR2 | 0.381757 | 0.043063 | 2.023098 | Up | melanin concentrating hormone receptor 2 |
| PTH2R | 0.380025 | 0.038056 | 2.07425 | Up | parathyroid hormone 2 receptor |
| NPTX2 | 0.379887 | 0.010458 | 2.560295 | Up | neuronal pentraxin 2 |
| NPPC | 0.378466 | 0.049675 | 1.96275 | Up | natriuretic peptide C |
| WIF1 | 0.377517 | 0.019372 | 2.338299 | Up | WNT inhibitory factor 1 |
| KCNV1 | 0.372499 | 0.031462 | 2.151176 | Up | potassium voltage-gated channel modifier subfamily V member 1 |
| SV2C | 0.372134 | 0.031439 | 2.151471 | Up | synaptic vesicle glycoprotein 2C |
| C5orf34 | 0.370143 | 0.015153 | 2.42871 | Up | chromosome 5 open reading frame 34 |
| STX1A | 0.369592 | 0.01032 | 2.564908 | Up | syntaxin 1A |
| NRGN | 0.368319 | 0.020771 | 2.312122 | Up | neurogranin |
| PCDHB8 | 0.368015 | 0.003663 | 2.905785 | Up | protocadherin beta 8 |
| PNOC | 0.366951 | 0.013533 | 2.469432 | Up | prepronociceptin |
| LOXHD1 | 0.366254 | 0.023957 | 2.257822 | Up | lipoxygenase homology PLAT domains 1 |
| HTR2A | 0.361543 | 0.011435 | 2.52913 | Up | 5-hydroxytryptamine receptor 2A |
| PPP1R14C | 0.358314 | 0.010364 | 2.563438 | Up | protein phosphatase 1 regulatory inhibitor subunit 14C |
| RHOV | 0.352358 | 0.014692 | 2.439882 | Up | ras homolog family member V |
| AHRR | 0.350993 | 0.013925 | 2.4592 | Up | aryl hydrocarbon receptor repressor |
| TAF7L | 0.348129 | 0.019223 | 2.341172 | Up | TATA-box binding protein associated factor 7 like |
| MPP7 | 0.345513 | 0.001635 | 3.149546 | Up | MAGUK p55 scaffold protein 7 |
| NECTIN3 | 0.345353 | 0.000109 | 3.870042 | Up | nectin cell adhesion molecule 3 |
| ZBBX | 0.344311 | 0.023528 | 2.264756 | Up | zinc finger B-box domain containing |
| RASGRF2 | 0.340738 | 0.005288 | 2.788931 | Up | Ras protein specific guanine nucleotide releasing factor 2 |
| GABBR2 | 0.338995 | 0.009365 | 2.598431 | Up | gamma-aminobutyric acid type B receptor subunit 2 |
| SLC37A1 | 0.337992 | 0.043337 | 2.02045 | Up | solute carrier family 37 member 1 |
| C1orf115 | 0.33636 | 0.013364 | 2.473927 | Up | chromosome 1 open reading frame 115 |
| NUDT4 | 0.333545 | 0.001735 | 3.132256 | Up | nudix hydrolase 4 |
| FAM153B | 0.33165 | 0.035857 | 2.098551 | Up | protein FAM153B |
| LRRC39 | 0.330105 | 0.002074 | 3.079386 | Up | leucine rich repeat containing 39 |
| CDC42EP3 | 0.326844 | 0.000551 | 3.454681 | Up | CDC42 effector protein 3 |
| PPFIBP1 | 0.326717 | 0.003592 | 2.911962 | Up | PPFIA binding protein 1 |
| ITPKA | 0.323644 | 0.040638 | 2.047205 | Up | inositol-trisphosphate 3-kinase A |
| NEURL1B | 0.320894 | 0.016696 | 2.393335 | Up | neuralized E3 ubiquitin protein ligase 1B |
| TMEM132D | 0.318818 | 0.010004 | 2.575695 | Up | transmembrane protein 132D |
| PDCD2L | 0.317885 | 0.00272 | 2.99771 | Up | programmed cell death 2 like |
| DOK6 | 0.317639 | 0.006461 | 2.723414 | Up | docking protein 6 |
| M1AP | 0.315942 | 0.032451 | 2.138809 | Up | meiosis 1 associated protein |
| MEF2C | 0.314542 | 0.017142 | 2.383647 | Up | myocyte enhancer factor 2C |
| C7orf25 | 0.314341 | 0.014067 | 2.455556 | Up | chromosome 7 open reading frame 25 |
| GPR153 | 0.314299 | 0.039852 | 2.055282 | Up | G protein-coupled receptor 153 |
| CAMKK2 | 0.313268 | 0.049697 | 1.96256 | Up | calcium/calmodulin dependent protein kinase kinase 2 |
| C11orf87 | 0.312875 | 0.014743 | 2.438643 | Up | chromosome 11 open reading frame 87 |
| HS6ST3 | 0.311648 | 0.009426 | 2.596216 | Up | heparansulfate 6-O-sulfotransferase 3 |
| TRAF5 | 0.309805 | 0.001194 | 3.240272 | Up | TNF receptor associated factor 5 |
| ZNF697 | 0.308679 | 0.026317 | 2.2215 | Up | zinc finger protein 697 |
| DKK2 | 0.307855 | 0.030827 | 2.159296 | Up | dickkopf WNT signaling pathway inhibitor 2 |
| ENC1 | 0.306519 | 0.036661 | 2.089515 | Up | ectodermal-neural cortex 1 |
| OLFM1 | 0.303661 | 0.035365 | 2.104155 | Up | olfactomedin 1 |
| PRKG2 | 0.303137 | 0.000359 | 3.568729 | Up | protein kinase cGMP-dependent 2 |
| EPHA5 | 0.301025 | 0.005197 | 2.794536 | Up | EPH receptor A5 |
| GULP1 | 0.300958 | 0.000858 | 3.333219 | Up | GULP PTB domain containing engulfment adaptor 1 |
| RGS6 | 0.297927 | 0.012213 | 2.505916 | Up | regulator of G protein signaling 6 |
| DLGAP3 | 0.296165 | 0.042037 | 2.033149 | Up | DLG associated protein 3 |
| NCALD | 0.29597 | 0.009681 | 2.587017 | Up | neurocalcin delta |
| GRIN2A | 0.294982 | 0.023171 | 2.270598 | Up | glutamate ionotropic receptor NMDA type subunit 2A |
| CACNG3 | 0.294866 | 0.011141 | 2.538235 | Up | calcium voltage-gated channel auxiliary subunit gamma 3 |
| GRIN3A | 0.294184 | 0.004325 | 2.853439 | Up | glutamate ionotropic receptor NMDA type subunit 3A |
| TTC9B | 0.293346 | 0.022089 | 2.288827 | Up | tetratricopeptide repeat domain 9B |
| PLCB1 | 0.292967 | 0.007253 | 2.684984 | Up | phospholipase C beta 1 |
| R3HDM1 | 0.292375 | 0.013763 | 2.463393 | Up | R3H domain containing 1 |
| LMO4 | 0.291424 | 0.012466 | 2.498661 | Up | LIM domain only 4 |
| KCNH7 | 0.290971 | 0.021196 | 2.304483 | Up | potassium voltage-gated channel subfamily H member 7 |
| PAK1 | 0.288583 | 0.009466 | 2.594739 | Up | p21 (RAC1) activated kinase 1 |
| PRDM8 | 0.287925 | 0.049986 | 1.960087 | Up | PR/SET domain 8 |
| LNX1 | 0.287522 | 0.009949 | 2.577588 | Up | ligand of numb-protein X 1 |
| ATP2B2 | 0.287026 | 0.029881 | 2.171659 | Up | ATPase plasma membrane Ca2+ transporting 2 |
| RASGRF1 | 0.28496 | 0.008837 | 2.618278 | Up | Ras protein specific guanine nucleotide releasing factor 1 |
| CA10 | 0.28439 | 0.0104 | 2.562231 | Up | carbonic anhydrase 10 |
| RABGAP1L-IT1 | 0.283654 | 0.036556 | 2.090685 | Up | RABGAP1L intronic transcript 1 |
| HTR7 | 0.282583 | 0.013581 | 2.468148 | Up | 5-hydroxytryptamine receptor 7 |
| RPH3AL | 0.280113 | 0.027995 | 2.19735 | Up | rabphilin 3A like (without C2 domains) |
| ADAMTS8 | 0.277491 | 0.01665 | 2.394342 | Up | ADAM metallopeptidase with thrombospondin type 1 motif 8 |
| NREP | 0.276292 | 0.03361 | 2.124722 | Up | neuronal regeneration related protein |
| ANO3 | 0.273606 | 0.012951 | 2.485117 | Up | anoctamin 3 |
| POC1A | 0.272074 | 0.028235 | 2.194006 | Up | POC1 centriolar protein A |
| CHRM3 | 0.270558 | 0.034497 | 2.11421 | Up | cholinergic receptor muscarinic 3 |
| PRKCB | 0.27032 | 0.016021 | 2.408448 | Up | protein kinase C beta |
| CNTN4 | 0.270214 | 0.00182 | 3.118086 | Up | contactin 4 |
| RTBDN | 0.269947 | 0.049736 | 1.962226 | Up | retbindin |
| RAB27B | 0.268762 | 0.01664 | 2.394561 | Up | RAB27B, member RAS oncogene family |
| CCDC85A | 0.268306 | 0.03686 | 2.087313 | Up | coiled-coil domain containing 85A |
| CAMK2N1 | 0.268247 | 0.020337 | 2.320077 | Up | calcium/calmodulin dependent protein kinase II inhibitor 1 |
| KCTD16 | 0.266965 | 0.014576 | 2.442745 | Up | potassium channel tetramerization domain containing 16 |
| PDZRN3 | 0.266622 | 0.018754 | 2.350386 | Up | PDZ domain containing ring finger 3 |
| MYT1L | 0.266523 | 0.004218 | 2.861364 | Up | myelin transcription factor 1 like |
| CHN1 | 0.266134 | 0.018381 | 2.357846 | Up | chimerin 1 |
| SGTB | 0.26496 | 0.003591 | 2.91202 | Up | small glutamine rich tetratricopeptide repeat co-chaperone beta |
| MAL2 | 0.263539 | 0.040076 | 2.052968 | Up | mal, T cell differentiation protein 2 |
| PPP1R9B | 0.263106 | 0.012462 | 2.49878 | Up | protein phosphatase 1 regulatory subunit 9B |
| STRBP | 0.262955 | 0.001265 | 3.22388 | Up | spermatid perinuclear RNA binding protein |
| HIVEP2 | 0.262756 | 0.006376 | 2.727809 | Up | HIVEP zinc finger 2 |
| MMD | 0.262031 | 0.017589 | 2.374155 | Up | monocyte to macrophage differentiation associated |
| RFPL1S | 0.261741 | 0.003044 | 2.963228 | Up | RFPL1 antisense RNA 1 |
| CNTN5 | 0.260902 | 0.039812 | 2.055696 | Up | contactin 5 |
| CSNK2A3 | 0.260571 | 0.022356 | 2.284272 | Up | casein kinase 2 alpha 3 |
| GNG3 | 0.260001 | 0.016499 | 2.39769 | Up | G protein subunit gamma 3 |
| TC2N | 0.257447 | 0.014502 | 2.444576 | Up | tandem C2 domains, nuclear |
| CDH9 | 0.255524 | 0.009467 | 2.594696 | Up | cadherin 9 |
| LDB2 | 0.255476 | 0.031272 | 2.153597 | Up | LIM domain binding 2 |
| CDKL5 | 0.254249 | 0.00675 | 2.708909 | Up | cyclin dependent kinase like 5 |
| NLK | 0.254089 | 0.014645 | 2.441033 | Up | nemo like kinase |
| GRM7 | 0.253016 | 0.002737 | 2.995861 | Up | glutamate metabotropic receptor 7 |
| SPATS2 | 0.251543 | 0.001383 | 3.198226 | Up | spermatogenesis associated serine rich 2 |
| CDK5R2 | 0.250996 | 0.022864 | 2.275696 | Up | cyclin dependent kinase 5 regulatory subunit 2 |
| DDN | 0.250637 | 0.048997 | 1.968617 | Up | dendrin |
| CNKSR2 | 0.250572 | 0.008357 | 2.637309 | Up | connector enhancer of kinase suppressor of Ras 2 |
| EEF1A2 | 0.250345 | 0.009669 | 2.587434 | Up | eukaryotic translation elongation factor 1 alpha 2 |
| HOMER1 | 0.248617 | 0.011287 | 2.533682 | Up | homer scaffold protein 1 |
| DLG4 | 0.247773 | 0.012901 | 2.486482 | Up | discs large MAGUK scaffold protein 4 |
| IGSF3 | 0.247583 | 0.007403 | 2.678164 | Up | immunoglobulin superfamily member 3 |
| SSX2IP | 0.24662 | 0.003677 | 2.904652 | Up | SSX family member 2 interacting protein |
| MCHR1 | 0.246503 | 0.025827 | 2.228808 | Up | melanin concentrating hormone receptor 1 |
| ZBTB18 | 0.246252 | 0.011888 | 2.515451 | Up | zinc finger and BTB domain containing 18 |
| GRIK1 | 0.245496 | 0.042921 | 2.02448 | Up | glutamate ionotropic receptor kainate type subunit 1 |
| VAMP2 | 0.245249 | 0.003406 | 2.928471 | Up | vesicle associated membrane protein 2 |
| RANBP17 | 0.244904 | 0.000445 | 3.512091 | Up | RAN binding protein 17 |
| DCAF6 | 0.243913 | 0.01414 | 2.453681 | Up | DDB1 and CUL4 associated factor 6 |
| ZC3HAV1L | 0.243671 | 0.028326 | 2.192736 | Up | zinc finger CCCH-type containing, antiviral 1 like |
| FRAS1 | 0.243668 | 0.005306 | 2.787842 | Up | Fraser extracellular matrix complex subunit 1 |
| PPP3CB | 0.242939 | 0.002561 | 3.01599 | Up | protein phosphatase 3 catalytic subunit beta |
| PAK5 | 0.240941 | 0.004481 | 2.842139 | Up | p21 (RAC1) activated kinase 5 |
| CCNE1 | 0.240358 | 0.028832 | 2.185777 | Up | cyclin E1 |
| TIPIN | 0.240201 | 0.011904 | 2.514988 | Up | TIMELESS interacting protein |
| GRIP2 | 0.239323 | 0.048813 | 1.970225 | Up | glutamate receptor interacting protein 2 |
| TRHDE | 0.239089 | 0.049654 | 1.962932 | Up | thyrotropin releasing hormone degrading enzyme |
| CNTNAP5 | 0.238814 | 0.015812 | 2.413225 | Up | contactin associated protein family member 5 |
| ZNF724 | 0.238497 | 0.042285 | 2.030703 | Up | zinc finger protein 724 |
| KIF21B | 0.237642 | 0.046219 | 1.993392 | Up | kinesin family member 21B |
| SYT3 | 0.237621 | 0.032778 | 2.134792 | Up | synaptotagmin 3 |
| ARHGAP32 | 0.237618 | 0.013214 | 2.477958 | Up | Rho GTPase activating protein 32 |
| DENND2C | 0.23658 | 0.016781 | 2.39148 | Up | DENN domain containing 2C |
| SPATC1L | 0.234437 | 0.043117 | 2.022573 | Up | spermatogenesis and centriole associated 1 like |
| RAB11FIP4 | 0.234201 | 0.008451 | 2.633505 | Up | RAB11 family interacting protein 4 |
| RNF175 | 0.234093 | 6.76E-05 | 3.984441 | Up | ring finger protein 175 |
| PXMP2 | 0.233465 | 0.026524 | 2.218446 | Up | peroxisomal membrane protein 2 |
| ZFP69B | 0.232656 | 0.003965 | 2.880908 | Up | ZFP69 zinc finger protein B |
| ZNF860 | 0.232396 | 0.014649 | 2.440931 | Up | zinc finger protein 860 |
| NECTIN1 | 0.232063 | 0.014145 | 2.453552 | Up | nectin cell adhesion molecule 1 |
| PPP6R1 | 0.23106 | 0.024801 | 2.244485 | Up | protein phosphatase 6 regulatory subunit 1 |
| OPTN | 0.229743 | 0.004532 | 2.838523 | Up | optineurin |
| TUNAR | 0.229716 | 0.03068 | 2.161193 | Up | TCL1 upstream neural differentiation-associated RNA |
| KCNJ6 | 0.228626 | 0.045846 | 1.996805 | Up | potassium inwardly rectifying channel subfamily J member 6 |
| SYT7 | 0.228524 | 0.043229 | 2.021489 | Up | synaptotagmin 7 |
| MYO5A | 0.228513 | 0.005364 | 2.784305 | Up | myosin VA |
| AGAP2 | 0.226462 | 0.046937 | 1.986865 | Up | ArfGAP with GTPase domain, ankyrin repeat and PH domain 2 |
| CALM3 | 0.226158 | 0.008706 | 2.62337 | Up | calmodulin 3 |
| UPP2 | 0.225348 | 0.037348 | 2.081939 | Up | uridinephosphorylase 2 |
| FBXO34 | 0.22475 | 0.017565 | 2.374669 | Up | F-box protein 34 |
| GCC2 | 0.224747 | 0.004973 | 2.808788 | Up | GRIP and coiled-coil domain containing 2 |
| SCN3B | 0.223706 | 0.047753 | 1.979564 | Up | sodium voltage-gated channel beta subunit 3 |
| IQSEC2 | 0.223453 | 0.036154 | 2.095191 | Up | IQ motif and Sec7 domain ArfGEF 2 |
| BRSK1 | 0.223388 | 0.047577 | 1.981131 | Up | BR serine/threonine kinase 1 |
| KIF3C | 0.222153 | 0.022694 | 2.278545 | Up | kinesin family member 3C |
| UNC13A | 0.22185 | 0.042263 | 2.030922 | Up | unc-13 homolog A |
| SLC39A10 | 0.221104 | 0.027278 | 2.207517 | Up | solute carrier family 39 member 10 |
| HLF | 0.221014 | 0.021374 | 2.301318 | Up | HLF transcription factor, PAR bZIP family member |
| PABPC1L2B | 0.219981 | 0.032924 | 2.133009 | Up | poly(A) binding protein cytoplasmic 1 like 2B |
| KCNJ3 | 0.219738 | 0.048427 | 1.973604 | Up | potassium inwardly rectifying channel subfamily J member 3 |
| PDK3 | 0.219522 | 0.047299 | 1.983612 | Up | pyruvate dehydrogenase kinase 3 |
| UBE2QL1 | 0.21941 | 0.03922 | 2.061869 | Up | ubiquitin conjugating enzyme E2 QL1 |
| PRKCZ | 0.219398 | 0.014967 | 2.433182 | Up | protein kinase C zeta |
| ANKRD30BL | 0.217802 | 0.031512 | 2.150549 | Up | ankyrin repeat domain 30B like |
| FAM81A | 0.217742 | 0.040132 | 2.052385 | Up | family with sequence similarity 81 member A |
| NPY1R | 0.217423 | 0.028723 | 2.187263 | Up | neuropeptide Y receptor Y1 |
| ERC2 | 0.216125 | 0.044726 | 2.00722 | Up | ELKS/RAB6-interacting/CAST family member 2 |
| SATB1 | 0.216 | 0.034243 | 2.117197 | Up | SATB homeobox 1 |
| CBX6 | 0.215909 | 0.047724 | 1.979815 | Up | chromobox 6 |
| PTMS | 0.215881 | 0.048843 | 1.969958 | Up | parathymosin |
| TMEM183A | 0.215655 | 0.001739 | 3.131454 | Up | transmembrane protein 183A |
| CDK16 | 0.21413 | 0.047635 | 1.980607 | Up | cyclin dependent kinase 16 |
| RGS7BP | 0.213918 | 0.010495 | 2.559076 | Up | regulator of G protein signaling 7 binding protein |
| GLT1D1 | 0.213899 | 0.003517 | 2.918529 | Up | glycosyltransferase 1 domain containing 1 |
| ARHGEF3 | 0.213821 | 0.016062 | 2.407502 | Up | Rho guanine nucleotide exchange factor 3 |
| GGCT | 0.213671 | 0.033445 | 2.126695 | Up | gamma-glutamylcyclotransferase |
| TNFAIP8L3 | 0.213592 | 0.012079 | 2.509827 | Up | TNF alpha induced protein 8 like 3 |
| PCLO | 0.213474 | 0.006717 | 2.710555 | Up | piccolo presynaptic cytomatrix protein |
| NRSN1 | 0.213331 | 0.012337 | 2.502346 | Up | neurensin 1 |
| FRMPD4 | 0.213308 | 0.021725 | 2.295144 | Up | FERM and PDZ domain containing 4 |
| NAPB | 0.213033 | 0.017958 | 2.366485 | Up | NSF attachment protein beta |
| NEK10 | 0.212732 | 0.003406 | 2.928507 | Up | NIMA related kinase 10 |
| THSD4 | 0.212688 | 0.042129 | 2.032246 | Up | thrombospondin type 1 domain containing 4 |
| C8orf44 | 0.212371 | 0.009351 | 2.598934 | Up | chromosome 8 putative open reading frame 44 |
| MAP2 | 0.211666 | 0.028583 | 2.189194 | Up | microtubule associated protein 2 |
| GRIN2B | 0.211345 | 0.02893 | 2.184445 | Up | glutamate ionotropic receptor NMDA type subunit 2B |
| CPNE8 | 0.211145 | 0.048982 | 1.96875 | Up | copine 8 |
| BRMS1L | 0.210976 | 0.003287 | 2.939569 | Up | BRMS1 like transcriptional repressor |
| SMS | 0.210339 | 0.003427 | 2.926609 | Up | spermine synthase |
| PAK6 | 0.210069 | 0.044141 | 2.012747 | Up | p21 (RAC1) activated kinase 6 |
| TCP11L1 | 0.209663 | 0.000962 | 3.301498 | Up | t-complex 11 like 1 |
| SYT16 | 0.209437 | 0.032944 | 2.132766 | Up | synaptotagmin 16 |
| CDK5R1 | 0.208528 | 0.046412 | 1.991623 | Up | cyclin dependent kinase 5 regulatory subunit 1 |
| XKR4 | 0.208272 | 0.010351 | 2.563888 | Up | XK related 4 |
| HRAS | 0.207998 | 0.041695 | 2.036548 | Up | HRas proto-oncogene, GTPase |
| YWHAH | 0.207881 | 0.039723 | 2.056614 | Up | tyrosine 3-monooxygenase/tryptophan 5-monooxygenase activation protein eta |
| RUNDC3A | 0.207621 | 0.031021 | 2.156808 | Up | RUN domain containing 3A |
| THOC7 | 0.207587 | 0.00107 | 3.271529 | Up | THO complex subunit 7 |
| PRMT8 | 0.2068 | 0.033956 | 2.120599 | Up | protein arginine methyltransferase 8 |
| PIK3R1 | 0.206729 | 0.005999 | 2.74783 | Up | phosphoinositide-3-kinase regulatory subunit 1 |
| CASC15 | 0.206499 | 0.000247 | 3.665264 | Up | cancer susceptibility 15 |
| C1orf216 | 0.206222 | 0.017694 | 2.371953 | Up | chromosome 1 open reading frame 216 |
| ALDH1L2 | 0.205975 | 0.015129 | 2.429281 | Up | aldehyde dehydrogenase 1 family member L2 |
| GNB1 | 0.205488 | 0.004705 | 2.826563 | Up | G protein subunit beta 1 |
| ZC3H8 | 0.205024 | 0.00111 | 3.261007 | Up | zinc finger CCCH-type containing 8 |
| MAP1A | 0.204817 | 0.024253 | 2.253099 | Up | microtubule associated protein 1A |
| SCN8A | 0.204423 | 0.029126 | 2.181778 | Up | sodium voltage-gated channel alpha subunit 8 |
| CDH8 | 0.204124 | 0.03364 | 2.124357 | Up | cadherin 8 |
| RBFOX1 | 0.203967 | 0.039112 | 2.063006 | Up | RNA binding fox-1 homolog 1 |
| R3HDM2 | 0.203256 | 0.004411 | 2.847191 | Up | R3H domain containing 2 |
| BASP1 | 0.202867 | 0.048893 | 1.969523 | Up | brain abundant membrane attached signal protein 1 |
| ROBO2 | 0.202766 | 0.007333 | 2.681308 | Up | roundabout guidance receptor 2 |
| ARHGAP33 | 0.20233 | 0.036024 | 2.09666 | Up | Rho GTPase activating protein 33 |
| CDH18 | 0.202067 | 0.042423 | 2.029343 | Up | cadherin 18 |
| CCNYL1 | 0.201258 | 0.001042 | 3.278989 | Up | cyclin Y like 1 |
| TLN2 | 0.200702 | 0.007364 | 2.679921 | Up | talin 2 |
| NOMO2 | 0.199748 | 0.017275 | 2.380805 | Up | NODAL modulator 2 |
| PPFIA2 | 0.199452 | 0.002905 | 2.977573 | Up | PTPRF interacting protein alpha 2 |
| PRICKLE1 | 0.199135 | 0.035685 | 2.100494 | Up | prickle planar cell polarity protein 1 |
| HENMT1 | 0.199092 | 0.026174 | 2.223626 | Up | HEN methyltransferase 1 |
| WASF1 | 0.198842 | 0.027246 | 2.20798 | Up | WASP family member 1 |
| OXR1 | 0.197204 | 0.042857 | 2.025096 | Up | oxidation resistance 1 |
| SYT5 | 0.196588 | 0.019223 | 2.34117 | Up | synaptotagmin 5 |
| DCLK1 | 0.196269 | 0.007805 | 2.660379 | Up | doublecortin like kinase 1 |
| ATXN7L3 | 0.19589 | 0.049991 | 1.960037 | Up | ataxin 7 like 3 |
| ELL2 | 0.195585 | 0.000617 | 3.42409 | Up | elongation factor for RNA polymerase II 2 |
| RGS7 | 0.195503 | 0.021365 | 2.301467 | Up | regulator of G protein signaling 7 |
| TIMM13 | 0.195156 | 0.012354 | 2.501866 | Up | translocase of inner mitochondrial membrane 13 |
| GPC6 | 0.19506 | 0.001168 | 3.246607 | Up | glypican 6 |
| BAP1 | 0.194632 | 0.041165 | 2.041864 | Up | BRCA1 associated deubiquitinase 1 |
| RIMBP2 | 0.193924 | 0.040132 | 2.052384 | Up | RIMS binding protein 2 |
| PPP1R35 | 0.193888 | 0.038735 | 2.066992 | Up | protein phosphatase 1 regulatory subunit 35 |
| RALB | 0.193553 | 0.023418 | 2.266541 | Up | RAS like proto-oncogene B |
| GEMIN6 | 0.192856 | 0.007311 | 2.682352 | Up | gem nuclear organelle associated protein 6 |
| CACNB2 | 0.191918 | 0.007314 | 2.682201 | Up | calcium voltage-gated channel auxiliary subunit beta 2 |
| CALM1 | 0.19189 | 0.007957 | 2.653884 | Up | calmodulin 1 |
| SVOP | 0.19127 | 0.031579 | 2.149701 | Up | SV2 related protein |
| ARL15 | 0.191203 | 0.012961 | 2.484851 | Up | ARF like GTPase 15 |
| OSBPL1A | 0.190667 | 0.003191 | 2.948666 | Up | oxysterol binding protein like 1A |
| EFR3A | 0.190351 | 0.017259 | 2.381153 | Up | EFR3 homolog A |
| YWHAG | 0.189947 | 0.016397 | 2.399947 | Up | tyrosine 3-monooxygenase/tryptophan 5-monooxygenase activation protein gamma |
| RAB6B | 0.189912 | 0.037035 | 2.085373 | Up | RAB6B, member RAS oncogene family |
| CAMTA2 | 0.188799 | 0.048817 | 1.970187 | Up | calmodulin binding transcription activator 2 |
| CHD3 | 0.187596 | 0.034899 | 2.109528 | Up | chromodomain helicase DNA binding protein 3 |
| NDUFB8 | 0.187554 | 0.014125 | 2.454063 | Up | NADH:ubiquinoneoxidoreductase subunit B8 |
| GALNT8 | 0.187342 | 0.027 | 2.211522 | Up | polypeptide N-acetylgalactosaminyltransferase 8 |
| C16orf87 | 0.186671 | 0.004154 | 2.866209 | Up | chromosome 16 open reading frame 87 |
| C14orf132 | 0.18663 | 0.034495 | 2.114233 | Up | chromosome 14 open reading frame 132 |
| BDP1 | 0.186424 | 0.009552 | 2.591626 | Up | B double prime 1, subunit of RNA polymerase III transcription initiation factor IIIB |
| RIIAD1 | 0.186227 | 0.041588 | 2.037623 | Up | regulatory subunit of type II PKA R-subunit domain containing 1 |
| ZFP2 | 0.186151 | 0.034068 | 2.119262 | Up | ZFP2 zinc finger protein |
| CDC40 | 0.185883 | 0.006495 | 2.721687 | Up | cell division cycle 40 |
| GRIA2 | 0.185484 | 0.006133 | 2.740595 | Up | glutamate ionotropic receptor AMPA type subunit 2 |
| DLG2 | 0.185469 | 0.000785 | 3.358111 | Up | discs large MAGUK scaffold protein 2 |
| CDC42SE2 | 0.185309 | 0.002401 | 3.03555 | Up | CDC42 small effector 2 |
| VBP1 | 0.185089 | 0.025646 | 2.231531 | Up | VHL binding protein 1 |
| SH3RF3 | 0.18422 | 0.038615 | 2.068263 | Up | SH3 domain containing ring finger 3 |
| PRICKLE2 | 0.184157 | 0.009027 | 2.611021 | Up | prickle planar cell polarity protein 2 |
| ARL4C | 0.183631 | 0.037778 | 2.077254 | Up | ARF like GTPase 4C |
| CACNG8 | 0.183609 | 0.024109 | 2.255382 | Up | calcium voltage-gated channel auxiliary subunit gamma 8 |
| STXBP5L | 0.183047 | 0.041458 | 2.038924 | Up | syntaxin binding protein 5L |
| SYCP2 | 0.182649 | 0.049969 | 1.960232 | Up | synaptonemal complex protein 2 |
| SCN2A | 0.18254 | 0.044608 | 2.008334 | Up | sodium voltage-gated channel alpha subunit 2 |
| KCNQ3 | 0.182225 | 0.009288 | 2.601278 | Up | potassium voltage-gated channel subfamily Q member 3 |
| CCDC181 | 0.182125 | 0.000981 | 3.296002 | Up | coiled-coil domain containing 181 |
| MYH10 | 0.181753 | 0.01162 | 2.523493 | Up | myosin heavy chain 10 |
| PPP3R1 | 0.181585 | 0.030806 | 2.159575 | Up | protein phosphatase 3 regulatory subunit B, alpha |
| FBXW7 | 0.181549 | 0.049236 | 1.96654 | Up | F-box and WD repeat domain containing 7 |
| SYNGAP1 | 0.181408 | 0.032016 | 2.144207 | Up | synaptic RasGTPase activating protein 1 |
| PRKCD | 0.181225 | 0.021754 | 2.294644 | Up | protein kinase C delta |
| CHCHD1 | 0.180801 | 0.026193 | 2.223342 | Up | coiled-coil-helix-coiled-coil-helix domain containing 1 |
| SMAP2 | 0.180745 | 0.009311 | 2.600428 | Up | small ArfGAP2 |
| STX1B | 0.180586 | 0.049435 | 1.964824 | Up | syntaxin 1B |
| NYAP2 | 0.180583 | 0.027656 | 2.202125 | Up | neuronal tyrosine-phosphorylated phosphoinositide-3-kinase adaptor 2 |
| GIT1 | 0.179593 | 0.026256 | 2.222401 | Up | GIT ArfGAP 1 |
| TMEM132B | 0.178738 | 0.012051 | 2.510649 | Up | transmembrane protein 132B |
| ADAM19 | 0.178205 | 0.035607 | 2.101387 | Up | ADAM metallopeptidase domain 19 |
| CNST | 0.177966 | 0.025592 | 2.232343 | Up | consortin, connexin sorting protein |
| YPEL1 | 0.177785 | 0.044011 | 2.013984 | Up | yippee like 1 |
| TIMM8A | 0.177353 | 0.028823 | 2.185894 | Up | translocase of inner mitochondrial membrane 8A |
| PITPNB | 0.177291 | 0.002179 | 3.064714 | Up | phosphatidylinositol transfer protein beta |
| CFDP1 | 0.177287 | 0.007078 | 2.693157 | Up | craniofacial development protein 1 |
| DENR | 0.177035 | 0.000522 | 3.46898 | Up | density regulated re-initiation and release factor |
| MADD | 0.176853 | 0.011133 | 2.538502 | Up | MAP kinase activating death domain |
| GDAP1L1 | 0.176678 | 0.040656 | 2.047026 | Up | ganglioside induced differentiation associated protein 1 like 1 |
| STXBP5 | 0.176606 | 0.028707 | 2.187481 | Up | syntaxin binding protein 5 |
| SLC35F3 | 0.176289 | 0.011138 | 2.538347 | Up | solute carrier family 35 member F3 |
| DOCK3 | 0.176246 | 0.013395 | 2.473078 | Up | dedicator of cytokinesis 3 |
| CXXC4 | 0.176222 | 0.003825 | 2.892223 | Up | CXXC finger protein 4 |
| ADD2 | 0.176181 | 0.025161 | 2.238925 | Up | adducin 2 |
| ARHGAP44 | 0.176054 | 0.012756 | 2.490505 | Up | Rho GTPase activating protein 44 |
| HOMER2 | 0.176002 | 0.017889 | 2.367911 | Up | homer scaffold protein 2 |
| BEX1 | 0.1757 | 0.041334 | 2.040167 | Up | brain expressed X-linked 1 |
| PEX5L | 0.1752 | 0.018435 | 2.356762 | Up | peroxisomal biogenesis factor 5 like |
| STXBP6 | 0.174293 | 0.035954 | 2.097449 | Up | syntaxin binding protein 6 |
| TRIM37 | 0.173591 | 0.010943 | 2.544512 | Up | tripartite motif containing 37 |
| ZC2HC1A | 0.173588 | 0.001135 | 3.254662 | Up | zinc finger C2HC-type containing 1A |
| GNAZ | 0.173567 | 0.017036 | 2.38594 | Up | G protein subunit alpha z |
| UBE2V2 | 0.173155 | 0.005884 | 2.754155 | Up | ubiquitin conjugating enzyme E2 V2 |
| PPP2R2C | 0.172961 | 0.018274 | 2.360021 | Up | protein phosphatase 2 regulatory subunit Bgamma |
| DACT3 | 0.172705 | 0.023323 | 2.268107 | Up | dishevelled binding antagonist of beta catenin 3 |
| NPAS2 | 0.172643 | 0.044524 | 2.009128 | Up | neuronal PAS domain protein 2 |
| C18orf21 | 0.172642 | 0.028745 | 2.186961 | Up | chromosome 18 open reading frame 21 |
| NAV3 | 0.172468 | 0.016398 | 2.399932 | Up | neuron navigator 3 |
| BCL11A | 0.171846 | 0.04765 | 1.980477 | Up | BCL11 transcription factor A |
| CERS6 | 0.171477 | 0.030291 | 2.16626 | Up | ceramide synthase 6 |
| TRIO | 0.171174 | 0.042535 | 2.028251 | Up | trio Rho guanine nucleotide exchange factor |
| PLEKHA5 | 0.171137 | 0.01085 | 2.547504 | Up | pleckstrin homology domain containing A5 |
| CDH10 | 0.170983 | 0.047043 | 1.985917 | Up | cadherin 10 |
| MEF2A | 0.170711 | 0.010484 | 2.559445 | Up | myocyte enhancer factor 2A |
| TECTA | 0.170694 | 0.041996 | 2.033557 | Up | tectorin alpha |
| KIRREL3 | 0.170351 | 0.035019 | 2.108144 | Up | kirre like nephrin family adhesion molecule 3 |
| SCAI | 0.169816 | 0.029277 | 2.17973 | Up | suppressor of cancer cell invasion |
| MYCBP2 | 0.169779 | 0.011557 | 2.525384 | Up | MYC binding protein 2 |
| FGF12 | 0.169355 | 0.022036 | 2.289743 | Up | fibroblast growth factor 12 |
| POLR3A | 0.169337 | 0.003595 | 2.91164 | Up | RNA polymerase III subunit A |
| FAM20B | 0.169122 | 0.014254 | 2.450787 | Up | FAM20B glycosaminoglycan xylosylkinase |
| CCSAP | 0.169093 | 0.005089 | 2.801336 | Up | centriole, cilia and spindle associated protein |
| MARK1 | 0.168973 | 0.004019 | 2.876628 | Up | microtubule affinity regulating kinase 1 |
| NBEA | 0.168973 | 0.003264 | 2.9417 | Up | neurobeachin |
| CXADR | 0.168459 | 0.02094 | 2.309063 | Up | CXADR Ig-like cell adhesion molecule |
| CDK5 | 0.168144 | 0.042143 | 2.032101 | Up | cyclin dependent kinase 5 |
| NETO1 | 0.168105 | 0.028609 | 2.188836 | Up | neuropilin and tolloid like 1 |
| CLIP3 | 0.167876 | 0.014916 | 2.434404 | Up | CAP-Gly domain containing linker protein 3 |
| CYCS | 0.16731 | 0.006494 | 2.721757 | Up | cytochrome c, somatic |
| UBXN2B | 0.166753 | 0.001384 | 3.197986 | Up | UBX domain protein 2B |
| MAP1LC3A | 0.166632 | 0.04054 | 2.048204 | Up | microtubule associated protein 1 light chain 3 alpha |
| GABARAPL1 | 0.166398 | 0.034946 | 2.108978 | Up | GABA type A receptor associated protein like 1 |
| DLG3 | 0.166294 | 0.010943 | 2.54452 | Up | discs large MAGUK scaffold protein 3 |
| DLGAP4 | 0.165998 | 0.047898 | 1.97827 | Up | DLG associated protein 4 |
| HPRT1 | 0.165736 | 0.029272 | 2.179808 | Up | hypoxanthine phosphoribosyltransferase 1 |
| SLC4A7 | 0.164988 | 0.037672 | 2.078405 | Up | solute carrier family 4 member 7 |
| CCNC | 0.164633 | 0.021533 | 2.298508 | Up | cyclin C |
| ARRB1 | 0.164162 | 0.006627 | 2.715039 | Up | arrestin beta 1 |
| NEDD4L | 0.163977 | 0.023036 | 2.272841 | Up | NEDD4 like E3 ubiquitin protein ligase |
| LRRC7 | 0.163712 | 0.010625 | 2.554808 | Up | leucine rich repeat containing 7 |
| SAMD12 | 0.16331 | 0.021874 | 2.292552 | Up | sterile alpha motif domain containing 12 |
| DCTN1 | 0.163274 | 0.00645 | 2.723979 | Up | dynactin subunit 1 |
| NRXN3 | 0.16263 | 0.023606 | 2.26349 | Up | neurexin 3 |
| EXOSC6 | 0.162445 | 0.011978 | 2.512792 | Up | exosome component 6 |
| SMUG1 | 0.162371 | 0.010498 | 2.558993 | Up | single-strand-selective monofunctional uracil-DNA glycosylase 1 |
| ATCAY | 0.16201 | 0.036742 | 2.088619 | Up | ATCAY kinesin light chain interacting caytaxin |
| PDSS2 | 0.161888 | 0.040715 | 2.04642 | Up | decaprenyldiphosphate synthase subunit 2 |
| PTPN4 | 0.161589 | 0.011397 | 2.530291 | Up | protein tyrosine phosphatase non-receptor type 4 |
| MAPK9 | 0.161365 | 0.020493 | 2.31719 | Up | mitogen-activated protein kinase 9 |
| PAK3 | 0.160974 | 0.011226 | 2.535577 | Up | p21 (RAC1) activated kinase 3 |
| NGRN | 0.16085 | 0.01966 | 2.33278 | Up | neugrin, neurite outgrowth associated |
| PPP1R21 | 0.160672 | 0.000592 | 3.435184 | Up | protein phosphatase 1 regulatory subunit 21 |
| HDAC9 | 0.160529 | 0.028516 | 2.190118 | Up | histone deacetylase 9 |
| RNF2 | 0.159188 | 0.003674 | 2.904911 | Up | ring finger protein 2 |
| NDUFA5 | 0.159106 | 0.0294 | 2.178076 | Up | NADH:ubiquinoneoxidoreductase subunit A5 |
| TTC3 | 0.159088 | 0.013097 | 2.481122 | Up | tetratricopeptide repeat domain 3 |
| CALM2 | 0.159083 | 0.005148 | 2.797599 | Up | calmodulin 2 |
| UQCRFS1 | 0.158925 | 0.047435 | 1.982396 | Up | ubiquinol-cytochrome c reductase, Rieske iron-sulfur polypeptide 1 |
| NDEL1 | 0.158877 | 0.00696 | 2.698761 | Up | nudE neurodevelopment protein 1 like 1 |
| GMFB | 0.158189 | 0.017738 | 2.371042 | Up | glia maturation factor beta |
| EPB41L4B | 0.157548 | 0.04713 | 1.985131 | Up | erythrocyte membrane protein band 4.1 like 4B |
| ZMAT2 | 0.157499 | 0.005602 | 2.770201 | Up | zinc finger matrin-type 2 |
| IFT20 | 0.157291 | 0.013351 | 2.474259 | Up | intraflagellar transport 20 |
| SEH1L | 0.156696 | 0.016797 | 2.391117 | Up | SEH1 like nucleoporin |
| MAFG | 0.156424 | 0.025916 | 2.227475 | Up | MAF bZIP transcription factor G |
| RTF1 | 0.156061 | 0.004016 | 2.876882 | Up | RTF1 homolog, Paf1/RNA polymerase II complex component |
| BRINP2 | 0.155531 | 0.027045 | 2.210869 | Up | BMP/retinoic acid inducible neural specific 2 |
| SPATS2L | 0.155139 | 0.016858 | 2.389784 | Up | spermatogenesis associated serine rich 2 like |
| YPEL3 | 0.154585 | 0.028555 | 2.189582 | Up | yippee like 3 |
| TPM3 | 0.154563 | 0.003084 | 2.959285 | Up | tropomyosin 3 |
| PURG | 0.154512 | 0.001232 | 3.231479 | Up | purine rich element binding protein G |
| TCEAL1 | 0.154372 | 0.014373 | 2.447816 | Up | transcription elongation factor A like 1 |
| HECW2 | 0.153749 | 0.038557 | 2.068884 | Up | HECT, C2 and WW domain containing E3 ubiquitin protein ligase 2 |
| ZCCHC17 | 0.153429 | 0.015393 | 2.422991 | Up | zinc finger CCHC-type containing 17 |
| TBC1D30 | 0.153378 | 0.04655 | 1.990375 | Up | TBC1 domain family member 30 |
| NRXN1 | 0.153235 | 0.021124 | 2.305764 | Up | neurexin 1 |
| GAS7 | 0.153191 | 0.048353 | 1.974254 | Up | growth arrest specific 7 |
| BAG4 | 0.153091 | 0.032749 | 2.135142 | Up | BAG cochaperone 4 |
| SUB1 | 0.152668 | 0.039937 | 2.054399 | Up | SUB1 regulator of transcription |
| FAM174A | 0.152531 | 0.015148 | 2.428822 | Up | family with sequence similarity 174 member A |
| KIF3B | 0.152418 | 0.010685 | 2.552849 | Up | kinesin family member 3B |
| DCUN1D5 | 0.152223 | 0.005081 | 2.801865 | Up | defective in cullinneddylation 1 domain containing 5 |
| SMIM13 | 0.15188 | 0.040062 | 2.053105 | Up | small integral membrane protein 13 |
| LANCL2 | 0.151586 | 0.010704 | 2.552203 | Up | LanC like glutathione S-transferase 2 |
| SOBP | 0.15122 | 0.026843 | 2.213797 | Up | sine oculis binding protein homolog |
| LARP1B | 0.151092 | 0.016596 | 2.39553 | Up | La ribonucleoprotein 1B |
| TBC1D9 | 0.149925 | 0.03674 | 2.088645 | Up | TBC1 domain family member 9 |
| DZIP1 | 0.149483 | 0.040579 | 2.047808 | Up | DAZ interacting zinc finger protein 1 |
| CELF5 | 0.149182 | 0.044068 | 2.013447 | Up | CUGBP Elav-like family member 5 |
| DUSP19 | 0.148875 | 0.04722 | 1.984319 | Up | dual specificity phosphatase 19 |
| ANKRD27 | 0.148733 | 0.000966 | 3.300295 | Up | ankyrin repeat domain 27 |
| EHBP1 | 0.148605 | 0.021176 | 2.304834 | Up | EH domain binding protein 1 |
| PHF7 | 0.148479 | 0.048082 | 1.976643 | Up | PHD finger protein 7 |
| SLC9B2 | 0.148071 | 0.03302 | 2.131838 | Up | solute carrier family 9 member B2 |
| AADAT | 0.147588 | 0.03203 | 2.144033 | Up | aminoadipate aminotransferase |
| GNL3 | 0.147504 | 0.035716 | 2.100152 | Up | G protein nucleolar 3 |
| INPP4A | 0.146664 | 0.008626 | 2.626535 | Up | inositol polyphosphate-4-phosphatase type I A |
| CRMP1 | 0.146577 | 0.042039 | 2.033131 | Up | collapsin response mediator protein 1 |
| TCEAL4 | 0.146355 | 0.014696 | 2.439782 | Up | transcription elongation factor A like 4 |
| STMN1 | 0.146114 | 0.043286 | 2.020942 | Up | stathmin 1 |
| IFT57 | 0.145858 | 0.021984 | 2.290647 | Up | intraflagellar transport 57 |
| BARHL1 | -2.94475 | 0.002171 | -3.06577 | Down | BarH like homeobox 1 |
| TFAP2B | -2.70269 | 0.00039 | -3.54669 | Down | transcription factor AP-2 beta |
| UNCX | -2.64577 | 0.001021 | -3.28471 | Down | UNC homeobox |
| C2CD4B | -2.53687 | 9.00E-05 | -3.91599 | Down | C2 calcium dependent domain containing 4B |
| IGLL1 | -2.25397 | 0.004521 | -2.8393 | Down | immunoglobulin lambda like polypeptide 1 |
| FAM81B | -2.07419 | 0.000809 | -3.34971 | Down | family with sequence similarity 81 member B |
| CXCL11 | -2.05677 | 0.010527 | -2.55803 | Down | C-X-C motif chemokine ligand 11 |
| FAT2 | -2.018 | 0.000222 | -3.69284 | Down | FAT atypical cadherin 2 |
| SLC22A31 | -1.92628 | 0.002704 | -2.99951 | Down | solute carrier family 22 member 31 |
| LTF | -1.92589 | 0.001203 | -3.23813 | Down | lactotransferrin |
| PRR35 | -1.90087 | 0.016812 | -2.3908 | Down | proline rich 35 |
| MAFIP | -1.82716 | 0.01445 | -2.44588 | Down | MAFF interacting protein |
| THRSP | -1.82487 | 0.02478 | -2.24482 | Down | thyroid hormone responsive |
| CHI3L2 | -1.77965 | 0.000833 | -3.34174 | Down | chitinase 3 like 2 |
| ASF1B | -1.77739 | 0.003179 | -2.94984 | Down | anti-silencing function 1B histone chaperone |
| MIA | -1.76828 | 0.011178 | -2.53709 | Down | MIA SH3 domain containing |
| RHBG | -1.75116 | 0.041321 | -2.0403 | Down | Rh family B glycoprotein |
| CASP5 | -1.73399 | 0.014038 | -2.45629 | Down | caspase 5 |
| CXCL3 | -1.72187 | 0.002413 | -3.03407 | Down | C-X-C motif chemokine ligand 3 |
| TNF | -1.71063 | 0.013473 | -2.471 | Down | tumor necrosis factor |
| SERPINA3 | -1.7021 | 0.002565 | -3.01561 | Down | serpin family A member 3 |
| RASSF9 | -1.67074 | 0.000175 | -3.75324 | Down | Ras association domain family member 9 |
| CXCL8 | -1.64925 | 0.013235 | -2.47739 | Down | C-X-C motif chemokine ligand 8 |
| HLA-DRB5 | -1.62438 | 0.001197 | -3.23953 | Down | major histocompatibility complex, class II, DR beta 5 |
| BARHL2 | -1.59115 | 0.009057 | -2.60988 | Down | BarH like homeobox 2 |
| CCL2 | -1.57321 | 0.000141 | -3.80727 | Down | C-C motif chemokine ligand 2 |
| GZMB | -1.55172 | 0.00715 | -2.68979 | Down | granzyme B |
| DAO | -1.53245 | 0.00148 | -3.17853 | Down | D-amino acid oxidase |
| SLC47A2 | -1.51955 | 0.026221 | -2.22292 | Down | solute carrier family 47 member 2 |
| DTHD1 | -1.49734 | 0.002839 | -2.98468 | Down | death domain containing 1 |
| PYHIN1 | -1.49141 | 0.009467 | -2.59472 | Down | pyrin and HIN domain family member 1 |
| CXCL2 | -1.46819 | 0.000581 | -3.44031 | Down | C-X-C motif chemokine ligand 2 |
| LILRA6 | -1.45669 | 0.005663 | -2.7667 | Down | leukocyte immunoglobulin like receptor A6 |
| HCG14 | -1.44292 | 0.025743 | -2.23006 | Down | HLA complex group 14 |
| CCDC26 | -1.38181 | 0.015271 | -2.42589 | Down | CCDC26 long non-coding RNA |
| SLAMF9 | -1.37701 | 0.038002 | -2.07483 | Down | SLAM family member 9 |
| WDR38 | -1.37087 | 0.016397 | -2.39996 | Down | WD repeat domain 38 |
| RXFP2 | -1.35008 | 0.040231 | -2.05137 | Down | relaxin family peptide receptor 2 |
| ADGB | -1.34908 | 0.003564 | -2.91438 | Down | androglobin |
| CDC45 | -1.32412 | 0.020462 | -2.31776 | Down | cell division cycle 45 |
| SIGLEC7 | -1.31334 | 0.015568 | -2.4189 | Down | sialic acid binding Ig like lectin 7 |
| RNU11 | -1.3111 | 0.000568 | -3.44633 | Down | RNA, U11 small nuclear |
| SOCS3 | -1.31047 | 1.29E-05 | -4.36148 | Down | suppressor of cytokine signaling 3 |
| SYT2 | -1.29829 | 0.003449 | -2.92461 | Down | synaptotagmin 2 |
| CDH15 | -1.29536 | 0.008502 | -2.63147 | Down | cadherin 15 |
| SCIN | -1.27958 | 0.000168 | -3.76231 | Down | scinderin |
| TBX21 | -1.27751 | 0.03553 | -2.10226 | Down | T-box transcription factor 21 |
| EN2 | -1.26923 | 0.006098 | -2.74247 | Down | engrailed homeobox 2 |
| IRX5 | -1.24624 | 0.041439 | -2.03911 | Down | iroquoishomeobox 5 |
| NKG7 | -1.24284 | 0.016016 | -2.40855 | Down | natural killer cell granule protein 7 |
| PRF1 | -1.23699 | 0.001818 | -3.11844 | Down | perforin 1 |
| TPSD1 | -1.23476 | 0.019797 | -2.33018 | Down | tryptase delta 1 |
| PCSK9 | -1.22958 | 0.015763 | -2.41436 | Down | proproteinconvertasesubtilisin/kexin type 9 |
| IL21R | -1.22721 | 0.00645 | -2.72399 | Down | interleukin 21 receptor |
| GALNT5 | -1.19259 | 0.028495 | -2.1904 | Down | polypeptide N-acetylgalactosaminyltransferase 5 |
| MS4A6A | -1.18535 | 0.001617 | -3.15289 | Down | membrane spanning 4-domains A6A |
| CFAP45 | -1.18219 | 0.009944 | -2.57776 | Down | cilia and flagella associated protein 45 |
| IFI30 | -1.17965 | 0.004276 | -2.85702 | Down | IFI30 lysosomalthiolreductase |
| TRBC1 | -1.17853 | 0.039568 | -2.05823 | Down | T cell receptor beta constant 1 |
| OASL | -1.14275 | 0.010322 | -2.56484 | Down | 2'-5'-oligoadenylate synthetase like |
| DYDC1 | -1.13018 | 0.01808 | -2.36398 | Down | DPY30 domain containing 1 |
| GBP5 | -1.12898 | 0.001365 | -3.20205 | Down | guanylate binding protein 5 |
| SNX20 | -1.12323 | 0.003185 | -2.94933 | Down | sorting nexin 20 |
| TIGIT | -1.12158 | 0.031781 | -2.14715 | Down | T cell immunoreceptor with Ig and ITIM domains |
| LHX1 | -1.11505 | 0.011737 | -2.51996 | Down | LIM homeobox 1 |
| RORC | -1.09774 | 0.035598 | -2.10149 | Down | RAR related orphan receptor C |
| SIX3 | -1.08098 | 0.003417 | -2.92746 | Down | SIX homeobox 3 |
| VENTX | -1.05923 | 0.016416 | -2.39953 | Down | VENT homeobox |
| TSGA10IP | -1.05608 | 0.037319 | -2.08225 | Down | testis specific 10 interacting protein |
| VCAM1 | -1.04737 | 0.006612 | -2.71576 | Down | vascular cell adhesion molecule 1 |
| FAM177B | -1.02854 | 0.017869 | -2.36831 | Down | family with sequence similarity 177 member B |
| RNU12 | -1.00639 | 0.000358 | -3.56937 | Down | RNA, U12 small nuclear |
| MPZL2 | -0.99647 | 0.024183 | -2.25421 | Down | myelin protein zero like 2 |
| WNT1 | -0.99565 | 0.039879 | -2.055 | Down | Wnt family member 1 |
| OSM | -0.98972 | 0.049967 | -1.96025 | Down | oncostatin M |
| CHI3L1 | -0.97056 | 4.90E-05 | -4.06057 | Down | chitinase 3 like 1 |
| HSPA6 | -0.95375 | 0.00065 | -3.40967 | Down | heat shock protein family A (Hsp70) member 6 |
| RNVU1-19 | -0.94519 | 0.011152 | -2.53789 | Down | RNA, variant U1 small nuclear 19 |
| RGS1 | -0.94184 | 0.033328 | -2.1281 | Down | regulator of G protein signaling 1 |
| FAM83E | -0.93037 | 0.037531 | -2.07994 | Down | family with sequence similarity 83 member E |
| GTSE1 | -0.92896 | 0.04034 | -2.05025 | Down | G2 and S-phase expressed 1 |
| RNU6ATAC | -0.92826 | 0.008621 | -2.62673 | Down | RNA, U6atac small nuclear |
| C4B | -0.91861 | 0.01241 | -2.50026 | Down | complement C4B (Chido/Rodgers blood group) |
| GALR3 | -0.91373 | 0.041495 | -2.03855 | Down | galanin receptor 3 |
| IRX2 | -0.91129 | 0.011951 | -2.51358 | Down | iroquoishomeobox 2 |
| CLPSL1 | -0.90938 | 0.016424 | -2.39935 | Down | colipase like 1 |
| PSORS1C1 | -0.9087 | 0.002451 | -3.02932 | Down | psoriasis susceptibility 1 candidate 1 |
| LMAN1L | -0.90754 | 0.01266 | -2.4932 | Down | lectin, mannose binding 1 like |
| PLA2G3 | -0.89863 | 0.032457 | -2.13874 | Down | phospholipase A2 group III |
| PKHD1L1 | -0.89837 | 0.036498 | -2.09134 | Down | PKHD1 like 1 |
| SELL | -0.89747 | 0.003891 | -2.88685 | Down | selectin L |
| ACP5 | -0.88744 | 0.044632 | -2.0081 | Down | acid phosphatase 5, tartrate resistant |
| LILRB3 | -0.88701 | 0.040105 | -2.05267 | Down | leukocyte immunoglobulin like receptor B3 |
| ARHGEF5 | -0.88323 | 0.00055 | -3.45524 | Down | Rho guanine nucleotide exchange factor 5 |
| RNU5A-1 | -0.87942 | 0.00608 | -2.74345 | Down | RNA, U5A small nuclear 1 |
| SNORD115-9 | -0.878 | 0.000474 | -3.49492 | Down | small nucleolar RNA, C/D box 115-9 |
| RNU5B-1 | -0.87338 | 0.006118 | -2.74139 | Down | RNA, U5B small nuclear 1 |
| CES1 | -0.86864 | 0.033291 | -2.12856 | Down | carboxylesterase 1 |
| P2RY4 | -0.86621 | 0.008083 | -2.64859 | Down | pyrimidinergic receptor P2Y4 |
| CD44 | -0.8564 | 0.041134 | -2.04218 | Down | CD44 molecule (IN blood group) |
| BATF2 | -0.84405 | 0.005187 | -2.7952 | Down | basic leucine zipper ATF-like transcription factor 2 |
| CRIP1 | -0.84381 | 0.041173 | -2.04178 | Down | cysteine rich protein 1 |
| EOMES | -0.84148 | 0.036101 | -2.09579 | Down | eomesodermin |
| ST6GALNAC2 | -0.8334 | 0.024532 | -2.24869 | Down | ST6 N-acetylgalactosaminide alpha-2,6-sialyltransferase 2 |
| SLC12A3 | -0.83172 | 0.024685 | -2.24629 | Down | solute carrier family 12 member 3 |
| PIRT | -0.83153 | 0.035456 | -2.10311 | Down | phosphoinositide interacting regulator of transient receptor potential channels |
| VTRNA1-1 | -0.82428 | 0.012824 | -2.48863 | Down | vault RNA 1-1 |
| LYZ | -0.81502 | 0.002755 | -2.99385 | Down | lysozyme |
| SUSD2 | -0.81332 | 0.008927 | -2.61483 | Down | sushi domain containing 2 |
| NAT1 | -0.80235 | 0.036395 | -2.09249 | Down | N-acetyltransferase 1 |
| SNORA80B | -0.79631 | 0.006963 | -2.6986 | Down | small nucleolar RNA, H/ACA box 80B |
| MUSTN1 | -0.79604 | 0.01449 | -2.44488 | Down | musculoskeletal, embryonic nuclear protein 1 |
| STEAP3 | -0.78964 | 0.00083 | -3.34243 | Down | STEAP3 metalloreductase |
| AZGP1 | -0.78421 | 0.011056 | -2.54093 | Down | alpha-2-glycoprotein 1, zinc-binding |
| SNORA57 | -0.78003 | 0.039488 | -2.05906 | Down | small nucleolar RNA, H/ACA box 57 |
| APLNR | -0.77994 | 0.026257 | -2.22239 | Down | apelin receptor |
| SFRP4 | -0.77723 | 0.002693 | -3.00077 | Down | secreted frizzled related protein 4 |
| CDC42BPG | -0.77641 | 0.027079 | -2.21037 | Down | CDC42 binding protein kinase gamma |
| C4A | -0.77536 | 0.017252 | -2.3813 | Down | complement C4A (Chido/Rodgers blood group) |
| LRRC69 | -0.77451 | 0.00041 | -3.53359 | Down | leucine rich repeat containing 69 |
| IGLV1-50 | -0.77202 | 0.044823 | -2.00631 | Down | immunoglobulin lambda variable 1-50 (non-functional) |
| SNORD3A | -0.77198 | 0.010029 | -2.57483 | Down | small nucleolar RNA, C/D box 3A |
| LILRB2 | -0.76192 | 0.011873 | -2.51589 | Down | leukocyte immunoglobulin like receptor B2 |
| GFAP | -0.75993 | 0.003785 | -2.89552 | Down | glial fibrillary acidic protein |
| SERPINA1 | -0.75942 | 0.021079 | -2.30657 | Down | serpin family A member 1 |
| GPR65 | -0.75181 | 0.025933 | -2.22721 | Down | G protein-coupled receptor 65 |
| BTN2A2 | -0.74417 | 2.71E-07 | -5.14235 | Down | butyrophilin subfamily 2 member A2 |
| SERPINH1 | -0.73942 | 0.005376 | -2.78359 | Down | serpin family H member 1 |
| IGLV5-52 | -0.73186 | 0.031525 | -2.15039 | Down | immunoglobulin lambda variable 5-52 |
| GBP3 | -0.73047 | 0.001519 | -3.17095 | Down | guanylate binding protein 3 |
| CFB | -0.7265 | 0.028624 | -2.18862 | Down | complement factor B |
| GMPR | -0.72503 | 0.005458 | -2.77871 | Down | guanosine monophosphate reductase |
| GRHL3 | -0.72355 | 0.029888 | -2.17157 | Down | grainyhead like transcription factor 3 |
| SEC14L4 | -0.72161 | 0.041874 | -2.03477 | Down | SEC14 like lipid binding 4 |
| CFI | -0.71513 | 0.006332 | -2.73006 | Down | complement factor I |
| S100A4 | -0.71495 | 0.048075 | -1.97671 | Down | S100 calcium binding protein A4 |
| KIF18A | -0.71006 | 0.027423 | -2.20544 | Down | kinesin family member 18A |
| GBP2 | -0.70219 | 0.001544 | -3.1663 | Down | guanylate binding protein 2 |
| ANKRD66 | -0.70125 | 0.034185 | -2.11789 | Down | ankyrin repeat domain 66 |
| RUNX3 | -0.69417 | 0.011734 | -2.52004 | Down | RUNX family transcription factor 3 |
| HLA-DOA | -0.68759 | 0.01584 | -2.41257 | Down | major histocompatibility complex, class II, DO alpha |
| SNORA3B | -0.68623 | 0.017137 | -2.38375 | Down | small nucleolar RNA, H/ACA box 3B |
| MGP | -0.68104 | 0.005618 | -2.76927 | Down | matrix Gla protein |
| ABI3BP | -0.67885 | 0.009652 | -2.58805 | Down | ABI family member 3 binding protein |
| HLA-DRA | -0.67819 | 0.007038 | -2.69504 | Down | major histocompatibility complex, class II, DR alpha |
| SERPINE1 | -0.67484 | 0.028732 | -2.18715 | Down | serpin family E member 1 |
| OOSP1 | -0.669 | 0.031477 | -2.15099 | Down | oocyte secreted protein 1 |
| TNFAIP8 | -0.66477 | 0.028255 | -2.19372 | Down | TNF alpha induced protein 8 |
| MYH11 | -0.66386 | 0.00143 | -3.18847 | Down | myosin heavy chain 11 |
| TNFAIP3 | -0.66294 | 0.001035 | -3.28074 | Down | TNF alpha induced protein 3 |
| SLC22A25 | -0.66133 | 0.014782 | -2.43768 | Down | solute carrier family 22 member 25 |
| BTN3A2 | -0.65994 | 0.000271 | -3.64168 | Down | butyrophilin subfamily 3 member A2 |
| CD74 | -0.65823 | 0.014924 | -2.43421 | Down | CD74 molecule |
| LAIR1 | -0.657 | 0.034499 | -2.11419 | Down | leukocyte associated immunoglobulin like receptor 1 |
| SNORD116-3 | -0.65561 | 0.017518 | -2.37565 | Down | small nucleolar RNA, C/D box 116-3 |
| TLR5 | -0.65415 | 0.00131 | -3.21388 | Down | toll like receptor 5 |
| C1orf141 | -0.65325 | 0.038149 | -2.07325 | Down | chromosome 1 open reading frame 141 |
| AEBP1 | -0.65154 | 0.001467 | -3.18119 | Down | AE binding protein 1 |
| ADAMTS1 | -0.64486 | 0.001321 | -3.21144 | Down | ADAM metallopeptidase with thrombospondin type 1 motif 1 |
| CLEC2B | -0.64475 | 0.019647 | -2.33302 | Down | C-type lectin domain family 2 member B |
| ISG20 | -0.64197 | 0.01815 | -2.36254 | Down | interferon stimulated exonuclease gene 20 |
| IL12A | -0.63694 | 0.008218 | -2.64299 | Down | interleukin 12A |
| HLA-DPA1 | -0.63603 | 0.013583 | -2.46811 | Down | major histocompatibility complex, class II, DP alpha 1 |
| CHRDL2 | -0.63337 | 0.031593 | -2.14953 | Down | chordin like 2 |
| NUPR1 | -0.62411 | 0.000191 | -3.72998 | Down | nuclear protein 1, transcriptional regulator |
| EPHA2 | -0.61828 | 0.007024 | -2.69572 | Down | EPH receptor A2 |
| COL3A1 | -0.61677 | 0.006293 | -2.73209 | Down | collagen type III alpha 1 chain |
| STX11 | -0.61661 | 0.043092 | -2.02281 | Down | syntaxin 11 |
| GBP4 | -0.61514 | 0.007381 | -2.67913 | Down | guanylate binding protein 4 |
| CD14 | -0.61434 | 0.0327 | -2.13574 | Down | CD14 molecule |
| TMPRSS3 | -0.61268 | 0.009496 | -2.59366 | Down | transmembrane serine protease 3 |
| HBB | -0.61026 | 0.033928 | -2.12092 | Down | hemoglobin subunit beta |
| RRAD | -0.5962 | 0.008068 | -2.6492 | Down | RRAD, Ras related glycolysis inhibitor and calcium channel regulator |
| CD99 | -0.59346 | 0.002085 | -3.07785 | Down | CD99 molecule (Xg blood group) |
| GBP1 | -0.59301 | 0.000938 | -3.30849 | Down | guanylate binding protein 1 |
| SCNN1G | -0.59063 | 0.04957 | -1.96365 | Down | sodium channel epithelial 1 subunit gamma |
| TNFRSF12A | -0.58918 | 0.041231 | -2.0412 | Down | TNF receptor superfamily member 12A |
| EMP1 | -0.58775 | 0.01173 | -2.52018 | Down | epithelial membrane protein 1 |
| APOBEC3D | -0.58164 | 0.005946 | -2.75075 | Down | apolipoprotein B mRNA editing enzyme catalytic subunit 3D |
| KANK4 | -0.57671 | 0.047915 | -1.97812 | Down | KN motif and ankyrin repeat domains 4 |
| PCAT29 | -0.576 | 0.039971 | -2.05404 | Down | prostate cancer associated transcript 29 |
| TCF19 | -0.57563 | 0.001871 | -3.10994 | Down | transcription factor 19 |
| SNORA46 | -0.57485 | 0.028363 | -2.19223 | Down | small nucleolar RNA, H/ACA box 46 |
| HLA-DRB1 | -0.57117 | 0.021963 | -2.291 | Down | major histocompatibility complex, class II, DR beta 1 |
| SPHK1 | -0.57057 | 0.02925 | -2.1801 | Down | sphingosine kinase 1 |
| ATF3 | -0.56904 | 0.02286 | -2.27576 | Down | activating transcription factor 3 |
| LY75 | -0.56877 | 0.030252 | -2.16677 | Down | lymphocyte antigen 75 |
| KIF19 | -0.56817 | 0.049833 | -1.9614 | Down | kinesin family member 19 |
| ZIC1 | -0.56638 | 0.014577 | -2.44272 | Down | Zic family member 1 |
| SLC35F4 | -0.56452 | 0.002891 | -2.97906 | Down | solute carrier family 35 member F4 |
| ZIC4 | -0.56137 | 0.030839 | -2.15914 | Down | Zic family member 4 |
| HMOX1 | -0.55891 | 0.009196 | -2.60469 | Down | hemeoxygenase 1 |
| DENND2D | -0.55583 | 0.015853 | -2.41228 | Down | DENN domain containing 2D |
| IFITM2 | -0.5555 | 0.040167 | -2.05203 | Down | interferon induced transmembrane protein 2 |
| GINS3 | -0.55497 | 0.004063 | -2.8732 | Down | GINS complex subunit 3 |
| ARHGEF39 | -0.55329 | 0.046345 | -1.99224 | Down | Rho guanine nucleotide exchange factor 39 |
| OLFML1 | -0.55133 | 0.007385 | -2.67896 | Down | olfactomedin like 1 |
| LMOD1 | -0.54847 | 0.008774 | -2.62075 | Down | leiomodin 1 |
| WFDC3 | -0.54659 | 0.033727 | -2.12333 | Down | WAP four-disulfide core domain 3 |
| SNORA9 | -0.54586 | 0.018288 | -2.35973 | Down | small nucleolar RNA, H/ACA box 9 |
| TMEM176A | -0.54411 | 0.000382 | -3.55242 | Down | transmembrane protein 176A |
| SLC1A5 | -0.5426 | 0.04544 | -2.00056 | Down | solute carrier family 1 member 5 |
| SLFN13 | -0.54172 | 0.043324 | -2.02057 | Down | schlafen family member 13 |
| ITGB7 | -0.54066 | 0.020385 | -2.31918 | Down | integrin subunit beta 7 |
| APOL6 | -0.53499 | 0.006027 | -2.74629 | Down | apolipoprotein L6 |
| NLRC5 | -0.52885 | 0.007765 | -2.66212 | Down | NLR family CARD domain containing 5 |
| HLA-DPB1 | -0.52753 | 0.00822 | -2.64288 | Down | major histocompatibility complex, class II, DP beta 1 |
| TAP1 | -0.52681 | 0.008422 | -2.63467 | Down | transporter 1, ATP binding cassette subfamily B member |
| CASZ1 | -0.52616 | 0.042504 | -2.02855 | Down | castor zinc finger 1 |
| ITGB4 | -0.52415 | 0.009565 | -2.59116 | Down | integrin subunit beta 4 |
| TMEM45A | -0.52316 | 0.042467 | -2.02891 | Down | transmembrane protein 45A |
| CASP1 | -0.52126 | 0.020614 | -2.31497 | Down | caspase 1 |
| IL15 | -0.52046 | 0.031857 | -2.1462 | Down | interleukin 15 |
| ITGAL | -0.518 | 0.01721 | -2.38219 | Down | integrin subunit alpha L |
| ZNF676 | -0.51724 | 0.008549 | -2.62956 | Down | zinc finger protein 676 |
| S100A11 | -0.51418 | 0.041993 | -2.03359 | Down | S100 calcium binding protein A11 |
| TJP2 | -0.51242 | 0.014927 | -2.43414 | Down | tight junction protein 2 |
| ID3 | -0.51053 | 0.008551 | -2.6295 | Down | inhibitor of DNA binding 3 |
| MFAP4 | -0.50481 | 0.020422 | -2.3185 | Down | microfibril associated protein 4 |
| ACTA2 | -0.50468 | 0.001841 | -3.11469 | Down | actin alpha 2, smooth muscle |
| CD58 | -0.5035 | 0.000321 | -3.59807 | Down | CD58 molecule |
| MLKL | -0.50289 | 0.043436 | -2.01949 | Down | mixed lineage kinase domain like pseudokinase |
| CARD6 | -0.50236 | 0.002951 | -2.97283 | Down | caspase recruitment domain family member 6 |
| GPX3 | -0.50149 | 0.036129 | -2.09547 | Down | glutathione peroxidase 3 |
| SPX | -0.49983 | 0.010275 | -2.56644 | Down | spexin hormone |
| LMNTD2 | -0.49956 | 0.026135 | -2.2242 | Down | lamin tail domain containing 2 |
| MMP11 | -0.49922 | 0.017298 | -2.38032 | Down | matrix metallopeptidase 11 |
| ARRDC4 | -0.49552 | 0.007118 | -2.69126 | Down | arrestin domain containing 4 |
| KLHL31 | -0.49408 | 0.039058 | -2.06358 | Down | kelch like family member 31 |
| CXCR4 | -0.49382 | 0.018232 | -2.36088 | Down | C-X-C motif chemokine receptor 4 |
| MFNG | -0.49212 | 0.03795 | -2.0754 | Down | MFNG O-fucosylpeptide 3-beta-N-acetylglucosaminyltransferase |
| OSMR | -0.49115 | 0.015305 | -2.42507 | Down | oncostatin M receptor |
| HLA-B | -0.48932 | 0.001563 | -3.16274 | Down | major histocompatibility complex, class I, B |
| SPARC | -0.48903 | 0.044179 | -2.01239 | Down | secreted protein acidic and cysteine rich |
| HSPA1B | -0.48888 | 0.044889 | -2.0057 | Down | heat shock protein family A (Hsp70) member 1B |
| ACY1 | -0.48757 | 0.010798 | -2.54917 | Down | aminoacylase 1 |
| APOC1 | -0.48489 | 0.037175 | -2.08384 | Down | apolipoprotein C1 |
| SNORA33 | -0.4818 | 0.047988 | -1.97748 | Down | small nucleolar RNA, H/ACA box 33 |
| RNF122 | -0.47883 | 0.02391 | -2.25857 | Down | ring finger protein 122 |
| PSMB9 | -0.47874 | 0.019309 | -2.33951 | Down | proteasome 20S subunit beta 9 |
| IFITM3 | -0.47516 | 0.041656 | -2.03694 | Down | interferon induced transmembrane protein 3 |
| HLA-DMB | -0.47478 | 0.040076 | -2.05297 | Down | major histocompatibility complex, class II, DM beta |
| TSPO | -0.47408 | 0.005095 | -2.80094 | Down | translocator protein |
| CDK2 | -0.47368 | 0.011479 | -2.52777 | Down | cyclin dependent kinase 2 |
| HLA-DMA | -0.47359 | 0.017864 | -2.36842 | Down | major histocompatibility complex, class II, DM alpha |
| CCDC80 | -0.4732 | 0.013637 | -2.46668 | Down | coiled-coil domain containing 80 |
| IER3 | -0.46976 | 0.006794 | -2.70677 | Down | immediate early response 3 |
| MMEL1 | -0.46747 | 0.03594 | -2.09761 | Down | membrane metalloendopeptidase like 1 |
| BAG3 | -0.4638 | 0.009766 | -2.584 | Down | BAG cochaperone 3 |
| SNORD115-17 | -0.46365 | 0.032752 | -2.13511 | Down | small nucleolar RNA, C/D box 115-17 |
| EFNA1 | -0.46318 | 0.024161 | -2.25457 | Down | ephrin A1 |
| DPT | -0.46305 | 0.041044 | -2.04309 | Down | dermatopontin |
| TMEM255A | -0.46092 | 0.032545 | -2.13765 | Down | transmembrane protein 255A |
| CHST6 | -0.4605 | 0.004329 | -2.85316 | Down | carbohydrate sulfotransferase 6 |
| SNORA80A | -0.46021 | 0.045526 | -1.99976 | Down | small nucleolar RNA, H/ACA box 80A |
| TMEM176B | -0.45984 | 0.000757 | -3.36821 | Down | transmembrane protein 176B |
| GINS2 | -0.45893 | 0.00372 | -2.90101 | Down | GINS complex subunit 2 |
| PLEKHA4 | -0.4584 | 0.024183 | -2.25421 | Down | pleckstrin homology domain containing A4 |
| LGALS9 | -0.45609 | 0.023984 | -2.25739 | Down | galectin 9 |
| FERMT3 | -0.45347 | 0.019778 | -2.33053 | Down | FERM domain containing kindlin 3 |
| DDIT4L | -0.45347 | 0.000746 | -3.37202 | Down | DNA damage inducible transcript 4 like |
| ZMYND10 | -0.45036 | 0.046772 | -1.98836 | Down | zinc finger MYND-type containing 10 |
| C16orf74 | -0.44947 | 0.003811 | -2.8934 | Down | chromosome 16 open reading frame 74 |
| HELZ2 | -0.44566 | 0.023696 | -2.26202 | Down | helicase with zinc finger 2 |
| B2M | -0.44439 | 0.002829 | -2.98577 | Down | beta-2-microglobulin |
| ANGPTL1 | -0.44278 | 0.024202 | -2.2539 | Down | angiopoietin like 1 |
| LCAT | -0.44268 | 0.01346 | -2.47136 | Down | lecithin-cholesterol acyltransferase |
| ACSM5 | -0.44179 | 0.016764 | -2.39184 | Down | acyl-CoA synthetase medium chain family member 5 |
| APOBEC3C | -0.44086 | 0.026781 | -2.21469 | Down | apolipoprotein B mRNA editing enzyme catalytic subunit 3C |
| RASL11A | -0.44019 | 0.04045 | -2.04912 | Down | RAS like family 11 member A |
| TNFSF10 | -0.44 | 0.035232 | -2.10568 | Down | TNF superfamily member 10 |
| LY6G5C | -0.43651 | 0.020379 | -2.31929 | Down | lymphocyte antigen 6 family member G5C |
| RGS9 | -0.43392 | 0.041476 | -2.03874 | Down | regulator of G protein signaling 9 |
| PTPRC | -0.433 | 0.044277 | -2.01145 | Down | protein tyrosine phosphatase receptor type C |
| TMBIM1 | -0.43292 | 0.005982 | -2.74877 | Down | transmembrane BAX inhibitor motif containing 1 |
| ANXA2 | -0.43005 | 0.037929 | -2.07562 | Down | annexin A2 |
| NFKB2 | -0.42803 | 0.014496 | -2.44472 | Down | nuclear factor kappa B subunit 2 |
| HLA-C | -0.42747 | 0.007462 | -2.67548 | Down | major histocompatibility complex, class I, C |
| VIM | -0.42521 | 0.0005 | -3.4809 | Down | vimentin |
| TMEM255B | -0.42481 | 0.006832 | -2.70493 | Down | transmembrane protein 255B |
| MYD88 | -0.42452 | 0.003579 | -2.91303 | Down | MYD88 innate immune signal transduction adaptor |
| LITAF | -0.42446 | 0.015802 | -2.41345 | Down | lipopolysaccharide induced TNF factor |
| WWTR1 | -0.42294 | 0.001811 | -3.11963 | Down | WW domain containing transcription regulator 1 |
| BEST3 | -0.4221 | 0.042426 | -2.02932 | Down | bestrophin 3 |
| HCLS1 | -0.41711 | 0.046242 | -1.99318 | Down | hematopoietic cell-specific Lyn substrate 1 |
| KCNE4 | -0.41694 | 0.043989 | -2.0142 | Down | potassium voltage-gated channel subfamily E regulatory subunit 4 |
| CLIC4 | -0.4128 | 0.026093 | -2.22482 | Down | chloride intracellular channel 4 |
| VAMP5 | -0.41209 | 0.011592 | -2.52433 | Down | vesicle associated membrane protein 5 |
| CYP27A1 | -0.41026 | 0.006467 | -2.72314 | Down | cytochrome P450 family 27 subfamily A member 1 |
| CBLN3 | -0.40839 | 0.03774 | -2.07766 | Down | cerebellin 3 precursor |
| SLC15A3 | -0.40838 | 0.008432 | -2.63426 | Down | solute carrier family 15 member 3 |
| FZD7 | -0.40815 | 0.020858 | -2.31055 | Down | frizzled class receptor 7 |
| RASL12 | -0.4071 | 0.04068 | -2.04678 | Down | RAS like family 12 |
| ENTPD2 | -0.40563 | 0.010945 | -2.54445 | Down | ectonucleoside triphosphate diphosphohydrolase 2 |
| BTN3A1 | -0.40313 | 0.000182 | -3.7423 | Down | butyrophilin subfamily 3 member A1 |
| IFIH1 | -0.40283 | 0.006215 | -2.73624 | Down | interferon induced with helicase C domain 1 |
| APLN | -0.40204 | 0.006566 | -2.71807 | Down | apelin |
| CPT1B | -0.40052 | 0.049795 | -1.96172 | Down | carnitinepalmitoyltransferase 1B |
| DNAJB1 | -0.39941 | 0.019696 | -2.33209 | Down | DnaJ heat shock protein family (Hsp40) member B1 |
| PHKG1 | -0.39826 | 0.0011 | -3.26369 | Down | phosphorylase kinase catalytic subunit gamma 1 |
| SEC14L6 | -0.39805 | 0.004937 | -2.81111 | Down | SEC14 like lipid binding 6 |
| RAB20 | -0.39738 | 0.047375 | -1.98294 | Down | RAB20, member RAS oncogene family |
| SSPN | -0.39729 | 0.012514 | -2.49731 | Down | sarcospan |
| MYOCD | -0.397 | 0.033879 | -2.12151 | Down | myocardin |
| MASP1 | -0.39664 | 0.036736 | -2.08868 | Down | MBL associated serine protease 1 |
| AMH | -0.39569 | 0.03936 | -2.06041 | Down | anti-Mullerian hormone |
| CD109 | -0.39511 | 0.012019 | -2.5116 | Down | CD109 molecule |
| TRIM47 | -0.39239 | 0.004109 | -2.86964 | Down | tripartite motif containing 47 |
| CLIC1 | -0.39214 | 0.028867 | -2.1853 | Down | chloride intracellular channel 1 |
| IGF2 | -0.39156 | 0.009775 | -2.58369 | Down | insulin like growth factor 2 |
| HACD4 | -0.3911 | 0.003427 | -2.92657 | Down | 3-hydroxyacyl-CoA dehydratase 4 |
| PRAM1 | -0.39088 | 0.027532 | -2.20389 | Down | PML-RARA regulated adaptor molecule 1 |
| NTN5 | -0.3905 | 0.012427 | -2.49977 | Down | netrin 5 |
| SCARNA13 | -0.38952 | 0.002068 | -3.08024 | Down | small Cajal body-specific RNA 13 |
| SEMA3F | -0.38907 | 0.036546 | -2.0908 | Down | semaphorin 3F |
| AQP4 | -0.38627 | 0.018098 | -2.36362 | Down | aquaporin 4 |
| PBX3 | -0.38593 | 0.036939 | -2.08643 | Down | PBX homeobox 3 |
| DTX3L | -0.38484 | 0.028727 | -2.18722 | Down | deltex E3 ubiquitin ligase 3L |
| HEYL | -0.38443 | 0.046633 | -1.98962 | Down | hes related family bHLH transcription factor with YRPW motif like |
| CDKN2C | -0.38424 | 0.009537 | -2.59217 | Down | cyclin dependent kinase inhibitor 2C |
| DKK1 | -0.38395 | 0.040612 | -2.04747 | Down | dickkopf WNT signaling pathway inhibitor 1 |
| SERPINB1 | -0.38258 | 0.020904 | -2.30972 | Down | serpin family B member 1 |
| P2RY1 | -0.38211 | 0.036014 | -2.09677 | Down | purinergic receptor P2Y1 |
| IFIT3 | -0.38127 | 0.008583 | -2.62822 | Down | interferon induced protein with tetratricopeptide repeats 3 |
| MYL9 | -0.38021 | 0.006019 | -2.74677 | Down | myosin light chain 9 |
| CA3 | -0.37837 | 0.011258 | -2.5346 | Down | carbonic anhydrase 3 |
| SNORA74B | -0.37814 | 0.032161 | -2.1424 | Down | small nucleolar RNA, H/ACA box 74B |
| RDH10 | -0.37774 | 0.006189 | -2.73757 | Down | retinol dehydrogenase 10 |
| ANTXR1 | -0.37726 | 0.000962 | -3.30149 | Down | ANTXR cell adhesion molecule 1 |
| SCD | -0.3758 | 0.006067 | -2.74412 | Down | stearoyl-CoA desaturase |
| HLA-E | -0.37488 | 0.009163 | -2.6059 | Down | major histocompatibility complex, class I, E |
| IRF1 | -0.37433 | 0.01925 | -2.34065 | Down | interferon regulatory factor 1 |
| RAB13 | -0.37378 | 9.04E-05 | -3.91489 | Down | RAB13, member RAS oncogene family |
| IL16 | -0.37376 | 0.022282 | -2.28553 | Down | interleukin 16 |
| GIMAP2 | -0.37318 | 0.039639 | -2.05749 | Down | GTPase, IMAP family member 2 |
| CSF1 | -0.37316 | 0.012896 | -2.48662 | Down | colony stimulating factor 1 |
| TPD52L1 | -0.37309 | 0.013709 | -2.46479 | Down | TPD52 like 1 |
| KIAA1755 | -0.37175 | 0.016432 | -2.39918 | Down | KIAA1755 |
| SPTLC3 | -0.37086 | 0.032382 | -2.13967 | Down | serine palmitoyltransferase long chain base subunit 3 |
| GYG2 | -0.37075 | 0.027981 | -2.19756 | Down | glycogenin 2 |
| VWA1 | -0.36906 | 0.008154 | -2.64563 | Down | von Willebrand factor A domain containing 1 |
| TUBA1C | -0.3685 | 0.031145 | -2.15522 | Down | tubulin alpha 1c |
| PADI2 | -0.36691 | 0.00615 | -2.7397 | Down | peptidyl arginine deiminase 2 |
| BGN | -0.36676 | 0.002332 | -3.04433 | Down | biglycan |
| ATP2A3 | -0.36676 | 0.013781 | -2.46292 | Down | ATPase sarcoplasmic/endoplasmic reticulum Ca2+ transporting 3 |
| TGFBR1 | -0.36637 | 0.020241 | -2.32184 | Down | transforming growth factor beta receptor 1 |
| PLA2G4B | -0.36475 | 0.02644 | -2.21969 | Down | phospholipase A2 group IVB |
| CD82 | -0.36434 | 0.013463 | -2.47129 | Down | CD82 molecule |
| AOC3 | -0.36411 | 0.043775 | -2.01624 | Down | amine oxidase copper containing 3 |
| HFE | -0.36137 | 0.00706 | -2.694 | Down | homeostatic iron regulator |
| SPSB2 | -0.36115 | 0.005764 | -2.76089 | Down | splA/ryanodine receptor domain and SOCS box containing 2 |
| MXRA8 | -0.35993 | 0.004312 | -2.85442 | Down | matrix remodeling associated 8 |
| ELN | -0.35969 | 0.002927 | -2.97535 | Down | elastin |
| FIRRE | -0.35939 | 0.04454 | -2.00898 | Down | firreintergenic repeating RNA element |
| CYBRD1 | -0.3586 | 0.009354 | -2.59884 | Down | cytochrome b reductase 1 |
| CAPG | -0.35843 | 0.006713 | -2.71075 | Down | capping actin protein, gelsolin like |
| PDPN | -0.35818 | 0.017355 | -2.37909 | Down | podoplanin |
| IFI16 | -0.35805 | 0.042924 | -2.02445 | Down | interferon gamma inducible protein 16 |
| HOMER3 | -0.35726 | 0.014142 | -2.45364 | Down | homer scaffold protein 3 |
| TMCO4 | -0.35698 | 0.009437 | -2.59582 | Down | transmembrane and coiled-coil domains 4 |
| HLA-F | -0.35516 | 0.014845 | -2.43613 | Down | major histocompatibility complex, class I, F |
| WEE1 | -0.35367 | 0.035876 | -2.09833 | Down | WEE1 G2 checkpoint kinase |
| RARRES2 | -0.35159 | 0.021098 | -2.30622 | Down | retinoic acid receptor responder 2 |
| FOXO1 | -0.35068 | 0.009211 | -2.60412 | Down | forkhead box O1 |
| LHFPL1 | -0.34955 | 0.037439 | -2.08095 | Down | LHFPL tetraspan subfamily member 1 |
| KLLN | -0.34944 | 0.00423 | -2.8605 | Down | killin, p53 regulated DNA replication inhibitor |
| ERI3-IT1 | -0.34915 | 0.027689 | -2.20167 | Down | ERI3 intronic transcript 1 |
| MCM5 | -0.34744 | 0.029816 | -2.17253 | Down | minichromosome maintenance complex component 5 |
| PRSS35 | -0.34652 | 0.019271 | -2.34025 | Down | serine protease 35 |
| PSTPIP1 | -0.34565 | 0.030492 | -2.16364 | Down | proline-serine-threonine phosphatase interacting protein 1 |
| ELOVL1 | -0.34535 | 0.038882 | -2.06543 | Down | ELOVL fatty acid elongase 1 |
| SYNE3 | -0.34511 | 0.027742 | -2.20091 | Down | spectrin repeat containing nuclear envelope family member 3 |
| GEM | -0.34496 | 0.047057 | -1.98579 | Down | GTP binding protein overexpressed in skeletal muscle |
| REEP4 | -0.34435 | 0.048515 | -1.97283 | Down | receptor accessory protein 4 |
| HSPB1 | -0.34427 | 0.007617 | -2.66861 | Down | heat shock protein family B (small) member 1 |
| FSTL1 | -0.34353 | 0.001979 | -3.09333 | Down | follistatin like 1 |
| LIMK2 | -0.34249 | 0.01308 | -2.48158 | Down | LIM domain kinase 2 |
| ZNF730 | -0.34184 | 0.026601 | -2.21732 | Down | zinc finger protein 730 |
| GFRA1 | -0.34132 | 0.02975 | -2.1734 | Down | GDNF family receptor alpha 1 |
| PSMB8 | -0.34109 | 0.020389 | -2.31911 | Down | proteasome 20S subunit beta 8 |
| NPC2 | -0.34063 | 0.002444 | -3.03016 | Down | NPC intracellular cholesterol transporter 2 |
| ENO4 | -0.33993 | 0.040635 | -2.04723 | Down | enolase 4 |
| IGDCC4 | -0.33906 | 0.028163 | -2.19501 | Down | immunoglobulin superfamily DCC subclass member 4 |
| PON3 | -0.33846 | 0.038576 | -2.06868 | Down | paraoxonase 3 |
| FGF1 | -0.33798 | 0.032421 | -2.13919 | Down | fibroblast growth factor 1 |
| FES | -0.33725 | 0.03633 | -2.09321 | Down | FES proto-oncogene, tyrosine kinase |
| CNGA4 | -0.33688 | 0.019443 | -2.33693 | Down | cyclic nucleotide gated channel subunit alpha 4 |
| POLR2J2 | -0.33685 | 0.012928 | -2.48576 | Down | RNA polymerase II subunit J2 |
| RAB32 | -0.33593 | 0.027905 | -2.19862 | Down | RAB32, member RAS oncogene family |
| ADIRF | -0.33569 | 0.018651 | -2.35244 | Down | adipogenesis regulatory factor |
| IL10RA | -0.33566 | 0.020443 | -2.31812 | Down | interleukin 10 receptor subunit alpha |
| C1RL | -0.33553 | 0.027931 | -2.19825 | Down | complement C1r subcomponent like |
| ARSI | -0.33477 | 0.048258 | -1.97509 | Down | arylsulfatase family member I |
| HKDC1 | -0.33437 | 0.016307 | -2.40197 | Down | hexokinase domain containing 1 |
| PDLIM4 | -0.33325 | 0.039684 | -2.05702 | Down | PDZ and LIM domain 4 |
| AGTRAP | -0.33281 | 0.025374 | -2.23566 | Down | angiotensin II receptor associated protein |
| UNC13D | -0.33257 | 0.044864 | -2.00593 | Down | unc-13 homolog D |
| GPR35 | -0.33226 | 0.036713 | -2.08895 | Down | G protein-coupled receptor 35 |
| HVCN1 | -0.33065 | 0.015493 | -2.42064 | Down | hydrogen voltage gated channel 1 |
| VAT1 | -0.33031 | 0.017274 | -2.38081 | Down | vesicle amine transport 1 |
| TLR4 | -0.32962 | 0.006084 | -2.74321 | Down | toll like receptor 4 |
| PMP2 | -0.32616 | 0.001685 | -3.14083 | Down | peripheral myelin protein 2 |
| C1R | -0.32605 | 0.028121 | -2.1956 | Down | complement C1r |
| TIMP1 | -0.32604 | 0.016065 | -2.40744 | Down | TIMP metallopeptidase inhibitor 1 |
| MAP3K8 | -0.32505 | 0.046347 | -1.99222 | Down | mitogen-activated protein kinase kinasekinase 8 |
| RNF32 | -0.32467 | 0.003412 | -2.92797 | Down | ring finger protein 32 |
| HEY2 | -0.32429 | 0.026694 | -2.21596 | Down | hes related family bHLH transcription factor with YRPW motif 2 |
| TRIM22 | -0.32188 | 0.026761 | -2.21499 | Down | tripartite motif containing 22 |
| LTBR | -0.32138 | 0.04021 | -2.05159 | Down | lymphotoxin beta receptor |
| ZNF665 | -0.32106 | 0.000311 | -3.60582 | Down | zinc finger protein 665 |
| SNTB1 | -0.31969 | 0.009582 | -2.59058 | Down | syntrophin beta 1 |
| CCNI2 | -0.31929 | 0.031512 | -2.15055 | Down | cyclin I family member 2 |
| PLSCR4 | -0.31868 | 0.015464 | -2.42133 | Down | phospholipid scramblase 4 |
| PDLIM3 | -0.31821 | 0.013784 | -2.46283 | Down | PDZ and LIM domain 3 |
| FAM111A | -0.31706 | 0.015917 | -2.41081 | Down | FAM111 trypsin like peptidase A |
| CYP4F11 | -0.31676 | 0.013994 | -2.45741 | Down | cytochrome P450 family 4 subfamily F member 11 |
| RHOC | -0.31442 | 0.001103 | -3.26272 | Down | ras homolog family member C |
| MRPL53 | -0.31334 | 0.035132 | -2.10683 | Down | mitochondrial ribosomal protein L53 |
| NKX3-1 | -0.31263 | 0.048623 | -1.97188 | Down | NK3 homeobox 1 |
| PHGDH | -0.31156 | 0.011087 | -2.53993 | Down | phosphoglycerate dehydrogenase |
| PLTP | -0.30819 | 0.001482 | -3.17819 | Down | phospholipid transfer protein |
| F11R | -0.30755 | 0.038847 | -2.06581 | Down | F11 receptor |
| FADS2 | -0.30717 | 7.46E-05 | -3.96104 | Down | fatty acid desaturase 2 |
| ACKR3 | -0.30652 | 0.003183 | -2.94951 | Down | atypical chemokine receptor 3 |
| PALLD | -0.30512 | 0.000378 | -3.55533 | Down | palladin, cytoskeletal associated protein |
| TLCD2 | -0.30448 | 0.041343 | -2.04008 | Down | TLC domain containing 2 |
| PLD2 | -0.30424 | 0.001139 | -3.25376 | Down | phospholipase D2 |
| PSMC3IP | -0.30371 | 0.014745 | -2.43858 | Down | PSMC3 interacting protein |
| ORAI3 | -0.30258 | 0.041849 | -2.03502 | Down | ORAI calcium release-activated calcium modulator 3 |
| SYNGR2 | -0.30208 | 0.03966 | -2.05727 | Down | synaptogyrin 2 |
| CTSH | -0.30176 | 0.013112 | -2.4807 | Down | cathepsin H |
| ARPC1B | -0.29859 | 0.040765 | -2.04592 | Down | actin related protein 2/3 complex subunit 1B |
| IGFBP7 | -0.29827 | 0.012769 | -2.49014 | Down | insulin like growth factor binding protein 7 |
| DDR2 | -0.29655 | 0.018312 | -2.35926 | Down | discoidin domain receptor tyrosine kinase 2 |
| CRB2 | -0.29565 | 0.031744 | -2.14762 | Down | crumbs cell polarity complex component 2 |
| DDR1 | -0.29474 | 0.015539 | -2.41957 | Down | discoidin domain receptor tyrosine kinase 1 |
| S1PR2 | -0.29474 | 0.037769 | -2.07736 | Down | sphingosine-1-phosphate receptor 2 |
| TAP2 | -0.2946 | 0.023776 | -2.26072 | Down | transporter 2, ATP binding cassette subfamily B member |
| NPFFR1 | -0.29425 | 0.049268 | -1.96627 | Down | neuropeptide FF receptor 1 |
| MAGT1 | -0.29266 | 0.038611 | -2.06831 | Down | magnesium transporter 1 |
| STK32A | -0.29232 | 0.025324 | -2.23643 | Down | serine/threonine kinase 32A |
| BTN3A3 | -0.29178 | 0.002021 | -3.08707 | Down | butyrophilin subfamily 3 member A3 |
| TEX9 | -0.29163 | 0.038778 | -2.06654 | Down | testis expressed 9 |
| EDNRB | -0.29086 | 0.039596 | -2.05793 | Down | endothelin receptor type B |
| LEPROT | -0.29056 | 0.001345 | -3.20626 | Down | leptin receptor overlapping transcript |
| TRIM56 | -0.29008 | 0.019575 | -2.3344 | Down | tripartite motif containing 56 |
| ITPKB | -0.28978 | 0.008657 | -2.62531 | Down | inositol-trisphosphate 3-kinase B |
| AGT | -0.2894 | 0.00765 | -2.66715 | Down | angiotensinogen |
| GNG12 | -0.28907 | 0.010758 | -2.55046 | Down | G protein subunit gamma 12 |
| NUDT1 | -0.28799 | 0.030527 | -2.16318 | Down | nudix hydrolase 1 |
| PLEKHB1 | -0.287 | 0.013047 | -2.48247 | Down | pleckstrin homology domain containing B1 |
| SLC43A3 | -0.28648 | 0.042631 | -2.02731 | Down | solute carrier family 43 member 3 |
| C16orf86 | -0.28624 | 0.042024 | -2.03329 | Down | chromosome 16 open reading frame 86 |
| STK33 | -0.28476 | 0.020613 | -2.315 | Down | serine/threonine kinase 33 |
| ERBB2 | -0.28379 | 0.003706 | -2.90213 | Down | erb-b2 receptor tyrosine kinase 2 |
| PRRX1 | -0.28341 | 0.002209 | -3.06066 | Down | paired related homeobox 1 |
| SYDE1 | -0.28315 | 0.029178 | -2.18108 | Down | synapse defective Rho GTPase homolog 1 |
| ABCC9 | -0.28271 | 0.026094 | -2.22481 | Down | ATP binding cassette subfamily C member 9 |
| NFATC1 | -0.2822 | 0.002146 | -3.06923 | Down | nuclear factor of activated T cells 1 |
| RENBP | -0.28182 | 0.013087 | -2.48139 | Down | renin binding protein |
| VWA5A | -0.28134 | 0.016562 | -2.39629 | Down | von Willebrand factor A domain containing 5A |
| RFX4 | -0.28098 | 0.027076 | -2.21043 | Down | regulatory factor X4 |
| FBLN5 | -0.28082 | 0.02231 | -2.28504 | Down | fibulin 5 |
| SLC25A10 | -0.28012 | 0.049866 | -1.96111 | Down | solute carrier family 25 member 10 |
| B3GNT7 | -0.27765 | 0.025812 | -2.22903 | Down | UDP-GlcNAc:betaGal beta-1,3-N-acetylglucosaminyltransferase 7 |
| ACSS3 | -0.27732 | 0.001114 | -3.26015 | Down | acyl-CoA synthetase short chain family member 3 |
| STON2 | -0.27679 | 0.004152 | -2.86635 | Down | stonin 2 |
| CEP295NL | -0.27625 | 0.04227 | -2.03085 | Down | CEP295 N-terminal like |
| GRM4 | -0.27596 | 0.024175 | -2.25434 | Down | glutamate metabotropic receptor 4 |
| AAMDC | -0.27588 | 0.003119 | -2.95576 | Down | adipogenesis associated Mth938 domain containing |
| DBX2 | -0.27581 | 0.019465 | -2.33651 | Down | developing brain homeobox 2 |
| SLC40A1 | -0.27577 | 0.026421 | -2.21997 | Down | solute carrier family 40 member 1 |
| PHYHD1 | -0.27573 | 0.033737 | -2.1232 | Down | phytanoyl-CoA dioxygenase domain containing 1 |
| ST7-OT4 | -0.27569 | 0.03802 | -2.07464 | Down | ST7 overlapping transcript 4 |
| CNN3 | -0.2752 | 0.001692 | -3.13963 | Down | calponin 3 |
| ROM1 | -0.27476 | 0.014222 | -2.45162 | Down | retinal outer segment membrane protein 1 |
| REST | -0.27447 | 0.012586 | -2.49527 | Down | RE1 silencing transcription factor |
| ABHD4 | -0.27437 | 0.002466 | -3.0275 | Down | abhydrolase domain containing 4, N-acyl phospholipase B |
| HNRNPA1L2 | -0.27409 | 0.000805 | -3.35117 | Down | heterogeneous nuclear ribonucleoprotein A1 like 2 |

**Table 2** The enriched GO terms of the up and down regulated differentially expressed genes

| **GO ID** | **CATEGORY** | **GO Name** | | **adjusted_p_value** | **negative_log10_of_adjusted_p_value** | | **Gene Count** | **Gene** |
| --- | --- | --- | --- | --- | --- | --- | --- | --- |
| **Up regulated genes** | | | | | | | | |
| GO:0007154 | BP | cell communication | 9.52E-12 | | 11.02119052 | | 201 | OR51E2,VN1R2,OR10H5,CABP5,OR2G6,AVPR1B,PDE6H,NPPA,EREG,GUCY2C,CARTPT,PIK3C2G,CUX2,GPR26,ONECUT1,PTGER3,OR3A2,ADAMTS20,ABCA4,EPHA1,MAEL,ERFE,ARHGAP10,BTNL9,RASL11B,NPR3,MCHR2,PTH2R,NPTX2,NPPC,WIF1,SV2C,STX1A,NRGN,PNOC,HTR2A,RHOV,RASGRF2,GABBR2,NUDT4,LRRC39,CDC42EP3,ITPKA,NEURL1B,DOK6,MEF2C,GPR153,CAMKK2,TRAF5,DKK2,OLFM1,PRKG2,EPHA5,RGS6,DLGAP3,NCALD,GRIN2A,CACNG3,GRIN3A,PLCB1,PAK1,RASGRF1,HTR7,RPH3AL,NREP,CHRM3,PRKCB,CNTN4,KCTD16,CHN1,PPP1R9B,GNG3,CDKL5,NLK,GRM7,CNKSR2,HOMER1,DLG4,SSX2IP,MCHR1,GRIK1,VAMP2,FRAS1,PPP3CB,PAK5,CCNE1,TIPIN,GRIP2,TRHDE,SYT3,ARHGAP32,SPATC1L,OPTN,TUNAR,SYT7,MYO5A,AGAP2,CALM3,SCN3B,IQSEC2,BRSK1,UNC13A,SLC39A10,KCNJ3,PDK3,PRKCZ,NPY1R,ERC2,CDK16,RGS7BP,ARHGEF3,GGCT,TNFAIP8L3,PCLO,NAPB,NEK10,GRIN2B,BRMS1L,PAK6,TCP11L1,CDK5R1,HRAS,YWHAH,RUNDC3A,PIK3R1,GNB1,MAP1A,SCN8A,CDH8,ROBO2,ARHGAP33,CCNYL1,PPFIA2,PRICKLE1,WASF1,SYT5,DCLK1,RGS7,GPC6,RIMBP2,RALB,CACNB2,YWHAG,GRIA2,DLG2,CDC42SE2,SH3RF3,PRICKLE2,CACNG8,STXBP5L,SCN2A,KCNQ3,PPP3R1,FBXW7,SYNGAP1,PRKCD,STX1B,NYAP2,GIT1,MADD,STXBP5,DOCK3,ARHGAP44,HOMER2,BEX1,PEX5L,GNAZ,DACT3,TRIO,MEF2A,SCAI,FGF12,MARK1,CXADR,CDK5,NETO1,CYCS,MAP1LC3A,GABARAPL1,DLG3,CCNC,ARRB1,SAMD12,NRXN3,MAPK9,PAK3,NDEL1,GMFB,IFT20,SEH1L,RTF1,NRXN1,BAG4,SUB1,LANCL2,DZIP1,DUSP19,SLC9B2,INPP4A,STMN1,IFT57 |
| GO:0065007 | BP | biological regulation | 1.04E-07 | | 6.98184629 | | 307 | OR51E2,VN1R2,MMP1,OR10H5,CABP5,ZNF705A,OR2G6,AVPR1B,PDE6H,NPPA,TPPP2,TJP3,EREG,CYP2C18,NEK2,GUCY2C,CARTPT,PIK3C2G,CUX2,GPR26,PAX5,ONECUT1,DES,PTGER3,OR3A2,ADAMTS20,ABCA4,ETV4,EPHA1,ASCL2,MAEL,ULBP2,ERFE,CACNA1S,ARHGAP10,BTNL9,RASL11B,NPR3,STYK1,MCHR2,PTH2R,NPTX2,NPPC,WIF1,SV2C,STX1A,NRGN,PNOC,HTR2A,PPP1R14C,RHOV,AHRR,MPP7,RASGRF2,GABBR2,C1ORF115,NUDT4,LRRC39,CDC42EP3,ITPKA,NEURL1B,DOK6,MEF2C,GPR153,CAMKK2,TRAF5,ZNF697,DKK2,ENC1,OLFM1,PRKG2,EPHA5,RGS6,DLGAP3,NCALD,GRIN2A,CACNG3,GRIN3A,PLCB1,LMO4,KCNH7,PAK1,PRDM8,ATP2B2,RASGRF1,HTR7,RPH3AL,ADAMTS8,NREP,ANO3,CHRM3,PRKCB,CNTN4,RAB27B,CAMK2N1,KCTD16,MYT1L,CHN1,PPP1R9B,HIVEP2,MMD,CSNK2A3,GNG3,LDB2,CDKL5,NLK,GRM7,CDK5R2,DDN,CNKSR2,EEF1A2,HOMER1,DLG4,SSX2IP,MCHR1,ZBTB18,GRIK1,VAMP2,DCAF6,PPP3CB,PAK5,CCNE1,TIPIN,GRIP2,TRHDE,SYT3,ARHGAP32,SPATC1L,RAB11FIP4,ZFP69B,ZNF860,NECTIN1,PPP6R1,OPTN,TUNAR,KCNJ6,SYT7,MYO5A,AGAP2,CALM3,GCC2,SCN3B,IQSEC2,BRSK1,UNC13A,SLC39A10,HLF,KCNJ3,PDK3,PRKCZ,NPY1R,ERC2,SATB1,CBX6,PTMS,TMEM183A,CDK16,RGS7BP,ARHGEF3,GGCT,TNFAIP8L3,PCLO,FRMPD4,NAPB,NEK10,MAP2,GRIN2B,BRMS1L,PAK6,TCP11L1,CDK5R1,XKR4,HRAS,YWHAH,RUNDC3A,PIK3R1,GNB1,ZC3H8,MAP1A,SCN8A,CDH8,RBFOX1,BASP1,ROBO2,ARHGAP33,CCNYL1,PPFIA2,PRICKLE1,HENMT1,WASF1,OXR1,SYT5,DCLK1,ATXN7L3,ELL2,RGS7,GPC6,BAP1,RIMBP2,PPP1R35,RALB,CACNB2,YWHAG,CAMTA2,CHD3,ZFP2,GRIA2,DLG2,CDC42SE2,VBP1,SH3RF3,PRICKLE2,CACNG8,STXBP5L,SYCP2,SCN2A,KCNQ3,MYH10,PPP3R1,FBXW7,SYNGAP1,PRKCD,STX1B,NYAP2,GIT1,ADAM19,CNST,CFDP1,MADD,STXBP5,DOCK3,ADD2,ARHGAP44,HOMER2,BEX1,PEX5L,STXBP6,TRIM37,GNAZ,UBE2V2,DACT3,NPAS2,NAV3,BCL11A,TRIO,MEF2A,SCAI,MYCBP2,FGF12,POLR3A,CCSAP,MARK1,NBEA,CXADR,CDK5,NETO1,CLIP3,CYCS,UBXN2B,MAP1LC3A,DLG3,DLGAP4,HPRT1,SLC4A7,CCNC,ARRB1,NEDD4L,SAMD12,DCTN1,NRXN3,EXOSC6,ATCAY,PDSS2,MAPK9,PAK3,NGRN,HDAC9,RNF2,NDEL1,GMFB,EPB41L4B,IFT20,SEH1L,MAFG,RTF1,BRINP2,YPEL3,PURG,HECW2,ZCCHC17,NRXN1,BAG4,SUB1,KIF3B,DCUN1D5,LANCL2,LARP1B,DZIP1,CELF5,DUSP19,ANKRD27,SLC9B2,GNL3,INPP4A,CRMP1,STMN1,IFT57 |
| GO:0045202 | CC | synapse | 2.06E-37 | | 36.68541899 | | 117 | CARTPT,DES,NPTX2,SV2C,STX1A,PNOC,HTR2A,NECTIN3,GABBR2,PPFIBP1,ITPKA,MEF2C,OLFM1,DLGAP3,GRIN2A,CACNG3,GRIN3A,PLCB1,ATP2B2,HTR7,RPH3AL,CHRM3,PRKCB,RAB27B,CAMK2N1,KCTD16,PDZRN3,MAL2,PPP1R9B,CNTN5,GNG3,CDH9,CDKL5,GRM7,DDN,CNKSR2,EEF1A2,HOMER1,DLG4,GRIK1,VAMP2,PPP3CB,PAK5,GRIP2,ARHGAP32,NECTIN1,SYT7,AGAP2,IQSEC2,BRSK1,UNC13A,KCNJ3,PRKCZ,FAM81A,ERC2,CDK16,RGS7BP,PCLO,FRMPD4,NAPB,GRIN2B,PAK6,CDK5R1,HRAS,YWHAH,GNB1,MAP1A,SCN8A,CDH8,ARHGAP33,TLN2,PPFIA2,WASF1,SYT5,DCLK1,GPC6,RIMBP2,CACNB2,SVOP,YWHAG,RAB6B,GRIA2,DLG2,CACNG8,STXBP5L,SCN2A,KCNQ3,PPP3R1,SYNGAP1,STX1B,GIT1,STXBP5,ADD2,ARHGAP44,HOMER2,BCL11A,TRIO,PLEKHA5,CDH10,KIRREL3,FGF12,NBEA,CDK5,NETO1,MAP1LC3A,DLG3,DLGAP4,NRXN3,ATCAY,MAPK9,PAK3,NDEL1,PURG,NRXN1,KIF3B,SLC9B2,INPP4A |
| GO:0042995 | CC | cell projection | 5.23E-20 | | 19.28155343 | | 119 | PDE6H,NPPA,TPPP2,ADAM21,ABCA4,STX1A,PNOC,LOXHD1,HTR2A,NECTIN3,GABBR2,C1ORF115,ITPKA,CAMKK2,OLFM1,EPHA5,RGS6,GRIN2A,CACNG3,GRIN3A,PAK1,ATP2B2,RASGRF1,HTR7,POC1A,CHRM3,PRKCB,CNTN4,RAB27B,CAMK2N1,KCTD16,PPP1R9B,CNTN5,GNG3,CDKL5,GRM7,CDK5R2,DDN,HOMER1,DLG4,SSX2IP,MCHR1,VAMP2,GRIP2,KIF21B,ARHGAP32,SPATC1L,NECTIN1,SYT7,MYO5A,AGAP2,CALM3,BRSK1,KIF3C,UNC13A,PRKCZ,NPY1R,ERC2,CDK16,RGS7BP,PCLO,NRSN1,FRMPD4,MAP2,GRIN2B,CDK5R1,GNB1,MAP1A,SCN8A,CDH8,BASP1,ROBO2,ARHGAP33,TLN2,PPFIA2,WASF1,SYT5,DCLK1,RGS7,GRIA2,DLG2,CDC42SE2,ARL4C,SCN2A,KCNQ3,CCDC181,MYH10,SYNGAP1,STX1B,GIT1,MADD,ARHGAP44,HOMER2,GNAZ,TRIO,KIRREL3,MYCBP2,CCSAP,MARK1,CXADR,CDK5,NETO1,DLG3,SLC4A7,ARRB1,DCTN1,NRXN3,ATCAY,NDEL1,IFT20,BRINP2,NRXN1,KIF3B,DZIP1,ANKRD27,SLC9B2,CRMP1,STMN1,IFT57 |
| GO:0019899 | MF | enzyme binding | 2.4906E-05 | | 4.603695566 | | 81 | CYP2C19,AVPR1B,NEK2,EPHA1,STX1A,RHOV,CDC42EP3,ITPKA,MEF2C,TRAF5,PRKG2,GRIN3A,PLCB1,PAK1,RPH3AL,PRKCB,CAMK2N1,PPP1R9B,LDB2,CDKL5,NLK,CDK5R2,CNKSR2,EEF1A2,DLG4,RANBP17,PPP3CB,CCNE1,RAB11FIP4,PPP6R1,TUNAR,MYO5A,AGAP2,CALM3,GCC2,BRSK1,PRKCZ,BRMS1L,CDK5R1,YWHAH,PRMT8,PIK3R1,GNB1,ARHGAP33,CCNYL1,WASF1,PPP1R35,RALB,YWHAG,CAMTA2,DLG2,CDC42SE2,PPP3R1,FBXW7,PRKCD,STX1B,GIT1,CNST,DOCK3,ADD2,ARHGAP44,PEX5L,TRIM37,DACT3,BCL11A,MEF2A,MYCBP2,NBEA,MAP1LC3A,GABARAPL1,DLG3,ARRB1,DCTN1,PAK3,HDAC9,IFT20,BAG4,KIF3B,DCUN1D5,DUSP19,ANKRD27 |
| GO:0098772 | MF | molecular function regulator activity | 2.4906E-05 | | 4.603695566 | | 80 | SERPINA11,CABP5,PDE6H,NPPA,EREG,CARTPT,ERFE,CACNA1S,ARHGAP10,RASL11B,NPPC,KCNV1,STX1A,PNOC,HTR2A,PPP1R14C,RASGRF2,DKK2,RGS6,CACNG3,PLCB1,RASGRF1,PRKCB,RAB27B,CAMK2N1,CHN1,PPP1R9B,GRM7,CDK5R2,CCNE1,ARHGAP32,DENND2C,PPP6R1,MYO5A,AGAP2,CALM3,SCN3B,IQSEC2,PRKCZ,ARHGEF3,CDK5R1,HRAS,YWHAH,RUNDC3A,PIK3R1,ARHGAP33,CCNYL1,RGS7,PPP1R35,RALB,YWHAG,CACNG8,STXBP5L,PPP3R1,FBXW7,SYNGAP1,PRKCD,SMAP2,GIT1,MADD,STXBP5,DOCK3,ARHGAP44,BEX1,GNAZ,PPP2R2C,TRIO,MYCBP2,FGF12,CDK5,CCNC,ARRB1,NEDD4L,NRXN3,GMFB,NRXN1,BAG4,TBC1D9,DUSP19,ANKRD27 |
| **Down regulated genes** | | | | | | | | |
| GO:0050896 | BP | response to stimulus | | 1.67E-17 | | 16.77770053 | 284 | TFAP2B,C2CD4B,IGLL1,CXCL11,LTF,THRSP,MIA,CASP5,CXCL3,TNF,SERPINA3,RASSF9,CXCL8,HLA-DRB5,CCL2,GZMB,SLC47A2,DTHD1,PYHIN1,CXCL2,LILRA6,RXFP2,CDC45,SOCS3,SYT2,TBX21,IRX5,NKG7,PRF1,PCSK9,IL21R,MS4A6A,OASL,GBP5,LHX1,RORC,VCAM1,WNT1,OSM,CHI3L1,HSPA6,RGS1,FAM83E,GTSE1,C4B,GALR3,CLPSL1,PLA2G3,PKHD1L1,SELL,ACP5,LILRB3,ARHGEF5,CES1,P2RY4,CD44,BATF2,CRIP1,EOMES,SLC12A3,PIRT,LYZ,NAT1,AZGP1,APLNR,SFRP4,C4A,LRRC69,IGLV1-50,LILRB2,GFAP,SERPINA1,GPR65,BTN2A2,SERPINH1,IGLV5-52,GBP3,CFB,GMPR,GRHL3,CFI,S100A4,KIF18A,GBP2,RUNX3,HLA-DOA,ABI3BP,HLA-DRA,SERPINE1,TNFAIP3,BTN3A2,CD74,LAIR1,TLR5,ADAMTS1,ISG20,IL12A,HLA-DPA1,CHRDL2,NUPR1,EPHA2,COL3A1,GBP4,CD14,HBB,RRAD,GBP1,SCNN1G,TNFRSF12A,APOBEC3D,HLA-DRB1,SPHK1,ATF3,LY75,ZIC1,HMOX1,IFITM2,OLFML1,WFDC3,SLFN13,ITGB7,NLRC5,HLA-DPB1,TAP1,ITGB4,CASP1,IL15,ITGAL,S100A11,TJP2,ID3,MFAP4,ACTA2,CD58,MLKL,GPX3,SPX,KLHL31,CXCR4,MFNG,OSMR,HLA-B,HSPA1B,IFITM3,HLA-DMB,TSPO,CDK2,HLA-DMA,CCDC80,IER3,BAG3,EFNA1,TMEM255A,GINS2,PLEKHA4,LGALS9,FERMT3,DDIT4L,B2M,ANGPTL1,APOBEC3C,TNFSF10,RGS9,PTPRC,TMBIM1,ANXA2,NFKB2,HLA-C,VIM,MYD88,LITAF,WWTR1,HCLS1,CLIC4,SLC15A3,FZD7,ENTPD2,BTN3A1,IFIH1,APLN,CPT1B,DNAJB1,RAB20,MYOCD,MASP1,AMH,CD109,CLIC1,IGF2,PRAM1,SEMA3F,AQP4,DTX3L,HEYL,DKK1,P2RY1,IFIT3,MYL9,CA3,SCD,HLA-E,IRF1,RAB13,IL16,CSF1,TPD52L1,VWA1,PADI2,ATP2A3,TGFBR1,PLA2G4B,AOC3,HFE,SPSB2,CYBRD1,PDPN,IFI16,HOMER3,HLA-F,RARRES2,FOXO1,MCM5,PSTPIP1,GEM,HSPB1,FSTL1,GFRA1,NPC2,PON3,FGF1,FES,CNGA4,RAB32,IL10RA,C1RL,AGTRAP,UNC13D,GPR35,HVCN1,TLR4,C1R,TIMP1,MAP3K8,HEY2,TRIM22,LTBR,PLSCR4,FAM111A,CYP4F11,RHOC,NKX3-1,F11R,ACKR3,PLD2,CTSH,ARPC1B,IGFBP7,DDR2,CRB2,DDR1,S1PR2,TAP2,NPFFR1,STK32A,BTN3A3,EDNRB,LEPROT,TRIM56,ITPKB,AGT,GNG12,NUDT1,PLEKHB1,STK33,ERBB2,PRRX1,SYDE1,ABCC9,NFATC1,RFX4,FBLN5,GRM4,ROM1,REST |
| GO:0032501 | BP | multicellular organismal process | | 6.07E-11 | | 10.21688927 | 235 | BARHL1,TFAP2B,UNCX,C2CD4B,FAT2,LTF,ASF1B,CASP5,TNF,SERPINA3,CXCL8,HLA-DRB5,BARHL2,CCL2,SLAMF9,RXFP2,ADGB,SOCS3,SYT2,SCIN,TBX21,EN2,IRX5,NKG7,PRF1,PCSK9,IL21R,CFAP45,GBP5,TIGIT,LHX1,RORC,SIX3,VCAM1,WNT1,OSM,CHI3L1,GALR3,IRX2,CLPSL1,PLA2G3,PKHD1L1,ACP5,LILRB3,ARHGEF5,CD44,BATF2,CRIP1,EOMES,SLC12A3,PIRT,MUSTN1,AZGP1,APLNR,SFRP4,LILRB2,GFAP,SERPINA1,BTN2A2,SERPINH1,GRHL3,KIF18A,RUNX3,HLA-DOA,MGP,ABI3BP,HLA-DRA,SERPINE1,MYH11,TNFAIP3,BTN3A2,CD74,TLR5,ADAMTS1,IL12A,HLA-DPA1,CHRDL2,NUPR1,EPHA2,COL3A1,CD14,TMPRSS3,HBB,GBP1,SCNN1G,TNFRSF12A,HLA-DRB1,SPHK1,ZIC1,ZIC4,HMOX1,LMOD1,TMEM176A,SLC1A5,HLA-DPB1,CASZ1,ITGB4,CASP1,IL15,ITGAL,TJP2,ID3,ACTA2,CD58,SPX,ARRDC4,CXCR4,MFNG,HLA-B,SPARC,HSPA1B,APOC1,HLA-DMB,TSPO,HLA-DMA,IER3,EFNA1,TMEM176B,LGALS9,FERMT3,B2M,LCAT,TNFSF10,RGS9,PTPRC,TMBIM1,ANXA2,NFKB2,VIM,MYD88,LITAF,WWTR1,HCLS1,KCNE4,CLIC4,FZD7,ENTPD2,BTN3A1,IFIH1,APLN,DNAJB1,SSPN,MYOCD,AMH,CD109,CLIC1,IGF2,PRAM1,NTN5,SEMA3F,AQP4,PBX3,HEYL,CDKN2C,DKK1,SERPINB1,P2RY1,MYL9,RDH10,ANTXR1,SCD,HLA-E,IRF1,RAB13,IL16,CSF1,KIAA1755,VWA1,PADI2,BGN,ATP2A3,TGFBR1,PLA2G4B,HFE,MXRA8,ELN,CYBRD1,CAPG,PDPN,IFI16,HOMER3,HLA-F,WEE1,RARRES2,FOXO1,HSPB1,FSTL1,LIMK2,GFRA1,PON3,FGF1,FES,CNGA4,IL10RA,PDLIM4,AGTRAP,UNC13D,GPR35,TLR4,TIMP1,MAP3K8,HEY2,LTBR,SNTB1,PDLIM3,CYP4F11,NKX3-1,PHGDH,PLTP,F11R,ACKR3,PALLD,CTSH,IGFBP7,DDR2,CRB2,DDR1,S1PR2,MAGT1,BTN3A3,EDNRB,TRIM56,ITPKB,AGT,NUDT1,ERBB2,PRRX1,SYDE1,ABCC9,NFATC1,RENBP,RFX4,SLC40A1,ROM1,REST |
| GO:0071944 | CC | cell periphery | | 1.03E-13 | | 12.98509047 | 208 | FAT2,LTF,RHBG,TNF,SERPINA3,HLA-DRB5,GZMB,SLC47A2,LILRA6,SLAMF9,RXFP2,SIGLEC7,SOCS3,SYT2,CDH15,SCIN,NKG7,PRF1,PCSK9,IL21R,MS4A6A,SNX20,TIGIT,VCAM1,MPZL2,WNT1,CHI3L1,RGS1,C4B,GALR3,LMAN1L,PLA2G3,PKHD1L1,SELL,LILRB3,ARHGEF5,P2RY4,CD44,SLC12A3,PIRT,SUSD2,STEAP3,AZGP1,APLNR,C4A,IGLV1-50,LILRB2,SERPINA1,GPR65,BTN2A2,SERPINH1,IGLV5-52,CFB,S100A4,KIF18A,HLA-DOA,MGP,ABI3BP,HLA-DRA,SERPINE1,BTN3A2,CD74,LAIR1,TLR5,AEBP1,ADAMTS1,CLEC2B,HLA-DPA1,EPHA2,COL3A1,STX11,GBP4,CD14,RRAD,GBP1,SCNN1G,TNFRSF12A,EMP1,HLA-DRB1,SPHK1,LY75,IFITM2,ARHGEF39,SLC1A5,ITGB7,HLA-DPB1,ITGB4,CASP1,ITGAL,TJP2,MFAP4,ACTA2,CD58,MLKL,MMP11,ARRDC4,CXCR4,OSMR,HLA-B,SPARC,IFITM3,HLA-DMB,HLA-DMA,CCDC80,MMEL1,EFNA1,DPT,PLEKHA4,LGALS9,ZMYND10,B2M,ANGPTL1,TNFSF10,LY6G5C,RGS9,PTPRC,TMBIM1,ANXA2,HLA-C,VIM,MYD88,LITAF,WWTR1,BEST3,HCLS1,KCNE4,CLIC4,VAMP5,FZD7,RASL12,ENTPD2,BTN3A1,SSPN,CD109,CLIC1,PRAM1,AQP4,DKK1,SERPINB1,P2RY1,MYL9,ANTXR1,HLA-E,RAB13,L16,CSF1,KIAA1755,VWA1,BGN,TGFBR1,CD82,AOC3,HFE,MXRA8,ELN,CYBRD1,PDPN,HOMER3,HLA-F,RARRES2,PSTPIP1,GEM,HSPB1,GFRA1,IGDCC4,FGF1,FES,CNGA4,IL10RA,PDLIM4,AGTRAP,GPR35,HVCN1,TLR4,TIMP1,LTBR,SNTB1,PLSCR4,RHOC,F11R,FADS2,ACKR3,PALLD,TLCD2,PLD2,ORAI3,CTSH,IGFBP7,DDR2,CRB2,DDR1,S1PR2,NPFFR1,MAGT1,STK32A,BTN3A3,EDNRB,AGT,GNG12,SLC43A3,ERBB2,SYDE1,ABCC9,FBLN5,STON2,GRM4,SLC40A1,ROM1 |
| GO:0012505 | CC | endomembrane system | | 2.47E-09 | | 8.607500144 | 158 | IGLL1,FAT2,LTF,TNF,SERPINA3,RASSF9,HLA-DRB5,SYT2,CDH15,PRF1,PCSK9,GALNT5,MS4A6A,GBP5,SNX20,VCAM1,WNT1,CHI3L1,HSPA6,LMAN1L,PLA2G3,SELL,LILRB3,CES1,CD44,ST6GALNAC2,LYZ,STEAP3,C4A,LILRB2,SERPINA1,SERPINH1,GBP3,GBP2,HLA-DOA,HLA-DRA,SERPINE1,CD74,LAIR1,IL12A,HLA-DPA1,COL3A1,STX11,GBP4,CD14,TMPRSS3,HBB,GBP1,HLA-DRB1,SPHK1,HMOX1,IFITM2,HLA-DPB1,TAP1,ITGB4,IL15,ITGAL,S100A11,CD58,SPX,MMP11,ARRDC4,CXCR4,MFNG,HLA-B,SPARC,HSPA1B,APOC1,RNF122,IFITM3,HLA-DMB,TSPO,CDK2,HLA-DMA,CHST6,TMEM176B,FERMT3,B2M,PTPRC,TMBIM1,ANXA2,HLA-C,MYD88,LITAF,VAMP5,CBLN3,SLC15A3,FZD7,ENTPD2,RAB20,SSPN,CD109,CLIC1,IGF2,HACD4,AQP4,DTX3L,DKK1,SERPINB1,RDH10,ANTXR1,SCD,HLA-E,RAB13,GIMAP2,CSF1,SPTLC3,VWA1,PADI2,BGN,ATP2A3,TGFBR1,PLA2G4B,AOC3,HFE,MXRA8,HLA-F,RARRES2,ELOVL1,SYNE3,REEP4,FSTL1,LIMK2,GFRA1,NPC2,PON3,FES,RAB32,ARSI,PDLIM4,AGTRAP,UNC13D,HVCN1,VAT1,TLR4,TIMP1,RNF32,TRIM22,LTBR,CYP4F11,RHOC,FADS2,ACKR3,PLD2,SYNGR2,CTSH,IGFBP7,TAP2,MAGT1,EDNRB,LEPROT,ITPKB,NUDT1,ERBB2,B3GNT7,STON2,SLC40A1,ABHD4 |
| GO:0005102 | MF | signaling receptor binding | | 3.97E-09 | | 8.401212221 | 75 | CXCL11,MIA,CXCL3,TNF,CXCL8,CCL2,CXCL2,PCSK9,TIGIT,SIX3,VCAM1,WNT1,OSM,LILRB2,GFAP,BTN2A2,S100A4,HLA-DRA,SERPINE1,BTN3A2,CD74,TLR5,IL12A,COL3A1,HLA-DRB1,ITGB7,TAP1,ITGB4,IL15,ITGAL,CD58,SPX,OSMR,HLA-B,HSPA1B,EFNA1,FERMT3,ANGPTL1,TNFSF10,PTPRC,TMBIM1,HLA-C,MYD88,FZD7,BTN3A1,APLN,AMH,IGF2,SEMA3F,DKK1,P2RY1,HLA-E,IL16,CSF1,TGFBR1,HFE,PDPN,HOMER3,HLA-F,RARRES2,GFRA1,FGF1,FES,TLR4,TIMP1,PLSCR4,F11R,S1PR2,TAP2,BTN3A3,EDNRB,LEPROT,AGT,ERBB2,FBLN5 |
| GO:0033218 | MF | amide binding | | 5.2942E-05 | | 4.276199918 | 26 | HLA-DRB5,RXFP2,GALR3,CRIP1,LILRB2,HLA-DOA,HLA-DRA,CD74,HLA-DPA1,HLA-DRB1,HLA-DPB1,TAP1,HLA-B,HLA-DMB,HLA-DMA,B2M,HLA-C,HLA-E,HLA-F,TLR4,PLTP,TAP2,NPFFR1,EDNRB,NFATC1,SLC40A1 |
|  |  |  | |  | |  |  |  |

**Table 3** The enriched pathway terms of the up and down regulated differentially expressed genes

| **Pathway ID** | **Pathway Name** | **adjusted_p_**  **value** | **negative_log10_of_adjusted_p_value** | **Gene Count** | **Gene** |
| --- | --- | --- | --- | --- | --- |
| **Up regulated genes** | | | | | |
| REAC:R-HSA-112316 | Neuronal System | 1.60E-12 | 11.79481023 | 41 | KCNV1,STX1A,NRGN,RASGRF2,GABBR2,PPFIBP1,CAMKK2,DLGAP3,NCALD,GRIN2A,CACNG3,GRIN3A,PLCB1,KCNH7,RASGRF1,PRKCB,GNG3,HOMER1,DLG4,GRIK1,VAMP2,GRIP2,KCNJ6,SYT7,KCNJ3,GRIN2B,HRAS,GNB1,PPFIA2,CACNB2,GRIA2,DLG2,CACNG8,KCNQ3,GIT1,HOMER2,NBEA,DLG3,DLGAP4,NRXN3,NRXN1 |
| REAC:R-HSA-112315 | Transmission across Chemical Synapses | 2.86E-10 | 9.543275856 | 30 | STX1A,NRGN,RASGRF2,GABBR2,CAMKK2,NCALD,GRIN2A,CACNG3,GRIN3A,PLCB1,RASGRF1,PRKCB,GNG3,DLG4,GRIK1,VAMP2,GRIP2,KCNJ6,KCNJ3,GRIN2B,HRAS,GNB1,PPFIA2,CACNB2,GRIA2,DLG2,CACNG8,GIT1,NBEA,DLG3 |
| REAC:R-HSA-162582 | Signal Transduction | 0.000321034 | 3.493448966 | 93 | AVPR1B,EREG,PTGER3,ETV4,ARHGAP10,MCHR2,PTH2R,WIF1,PNOC,HTR2A,RHOV,MPP7,RASGRF2,GABBR2,CDC42EP3,NEURL1B,MEF2C,CAMKK2,DKK2,PRKG2,RGS6,PLCB1,PAK1,RASGRF1,HTR7,CHRM3,PRKCB,CHN1,GNG3,NLK,GRM7,CDK5R2,CNKSR2,DLG4,MCHR1,PPP3CB,PAK5,CCNE1,ARHGAP32,OPTN,PDK3,PRKCZ,NPY1R,CBX6,ARHGEF3,GRIN2B,CPNE8,PAK6,CDK5R1,HRAS,YWHAH,PIK3R1,GNB1,BASP1,ARHGAP33,PRICKLE1,WASF1,RGS7,RALB,YWHAG,CHD3,DLG2,CDC42SE2,ARL4C,MYH10,PPP3R1,SYNGAP1,PRKCD,GIT1,DOCK3,ARHGAP44,GNAZ,TRIO,MEF2A,SCAI,NBEA,CDK5,CLIP3,DLG3,SLC4A7,CCNC,ARRB1,NEDD4L,PAK3,HDAC9,RNF2,NDUFA5,NDEL1,TPM3,BAG4,DZIP1,STMN1,IFT57 |
| REAC:R-HSA-388396 | GPCR downstream signalling | 0.001593428 | 2.797667479 | 32 | AVPR1B,PTGER3,MCHR2,PTH2R,PNOC,HTR2A,RASGRF2,GABBR2,CAMKK2,RGS6,PLCB1,PAK1,HTR7,CHRM3,PRKCB,GNG3,GRM7,MCHR1,PPP3CB,NPY1R,ARHGEF3,HRAS,PIK3R1,GNB1,RGS7,PPP3R1,PRKCD,GNAZ,TRIO,NBEA,CDK5,ARRB1 |
| REAC:R-HSA-9716542 | Signaling by Rho GTPases, MiroGTPases and RHOBTB3 | 0.00183901 | 2.735415983 | 35 | ARHGAP10,RHOV,MPP7,RASGRF2,CDC42EP3,PAK1,PRKCB,CHN1,DLG4,PAK5,CCNE1,ARHGAP32,PRKCZ,ARHGEF3,CPNE8,PAK6,YWHAH,PIK3R1,BASP1,ARHGAP33,WASF1,YWHAG,CDC42SE2,MYH10,PRKCD,GIT1,DOCK3,ARHGAP44,TRIO,SCAI,SLC4A7,PAK3,NDUFA5,NDEL1,TPM3 |
| REAC:R-HSA-422475 | Axon guidance | 0.007313797 | 2.135857128 | 27 | EPHA1,CACNA1S,DOK6,EPHA5,PAK1,DLG4,PPP3CB,PAK5,AGAP2,SCN3B,GRIN2B,PAK6,CDK5R1,HRAS,PIK3R1,SCN8A,ROBO2,CACNB2,SCN2A,KCNQ3,MYH10,GIT1,TRIO,CDK5,DLG3,PAK3,CRMP1 |
| **Down regulated genes** | | | | | |
| REAC:R-HSA-168256 | Immune System | 2.94E-13 | 12.5322135 | 114 | LTF,TNF,SERPINA3,CXCL8,HLA-DRB5,CCL2,CXCL2,LILRA6,SIGLEC7,SOCS3,IL21R,IFI30,OASL,GBP5,RORC,VCAM1,OSM,CHI3L1,HSPA6,C4B,SELL,LILRB3,CD44,LYZ,C4A,LILRB2,SERPINA1,BTN2A2,GBP3,CFB,CFI,KIF18A,GBP2,HLA-DOA,HLA-DRA,TNFAIP3,BTN3A2,CD74,LAIR1,TLR5,CLEC2B,ISG20,IL12A,HLA-DPA1,COL3A1,GBP4,CD14,HBB,GBP1,TNFRSF12A,HLA-DRB1,HMOX1,IFITM2,ITGB7,NLRC5,HLA-DPB1,TAP1,CASP1,IL15,ITGAL,S100A11,CD58,OSMR,HLA-B,HSPA1B,PSMB9,IFITM3,HLA-DMB,HLA-DMA,LGALS9,B2M,PTPRC,TMBIM1,ANXA2,NFKB2,HLA-C,VIM,MYD88,BTN3A1,IFIH1,MASP1,DTX3L,SERPINB1,IFIT3,HLA-E,IRF1,IL16,CSF1,TUBA1C,PADI2,SPSB2,IFI16,HLA-F,FOXO1,PSTPIP1,PSMB8,NPC2,IL10RA,UNC13D,HVCN1,VAT1,TLR4,TIMP1,MAP3K8,TRIM22,LTBR,PLD2,CTSH,ARPC1B,TAP2,MAGT1,BTN3A3,TRIM56,NFATC1 |
| REAC:R-HSA-6798695 | Neutrophil degranulation | 0.000527302 | 3.277940426 | 31 | LTF,SERPINA3,CHI3L1,HSPA6,SELL,LILRB3,CD44,LYZ,LILRB2,SERPINA1,LAIR1,CD14,HBB,ITGAL,S100A11,CD58,HLA-B,HSPA1B,B2M,PTPRC,TMBIM1,ANXA2,HLA-C,SERPINB1,PADI2,NPC2,UNC13D,HVCN1,VAT1,CTSH,MAGT1 |
| REAC:R-HSA-2132295 | MHC class II antigen presentation | 0.001685513 | 2.773267891 | 13 | HLA-DRB5,IFI30,KIF18A,HLA-DOA,HLA-DRA,CD74,HLA-DPA1,HLA-DRB1,HLA-DPB1,HLA-DMB,HLA-DMA,TUBA1C,CTSH |
| REAC:R-HSA-449147 | Signaling by Interleukins | 0.003690644 | 2.432897868 | 28 | TNF,CXCL8,CCL2,CXCL2,SOCS3,IL21R,RORC,VCAM1,OSM,IL12A,HMOX1,NLRC5,CASP1,IL15,OSMR,PSMB9,LGALS9,ANXA2,NFKB2,VIM,MYD88,IL16,CSF1,FOXO1,PSMB8,IL10RA,TIMP1,MAP3K8 |
| REAC:R-HSA-1474244 | Extracellular matrix organization | 0.016559302 | 1.780957961 | 19 | VCAM1,CD44,SERPINH1,SERPINE1,ADAMTS1,COL3A1,ITGB7,ITGB4,ITGAL,MFAP4,MMP11,SPARC,BGN,ELN,TIMP1,F11R,DDR2,DDR1,FBLN5 |
| REAC:R-HSA-381426 | Regulation of Insulin-like Growth Factor (IGF) transport and uptake by Insulin-like Growth Factor Binding Proteins (IGFBPs) | 0.049901556 | 1.301885916 | 10 | PCSK9,C4A,SERPINA1,IGF2,CSF1,VWA1,MXRA8,FSTL1,TIMP1,IGFBP7 |
|  |  |  |  |  |  |

**Table 4** Topology table for up and down regulated genes

| **Regulation** | **Node** | **Degree** | **Betweenness** | **Stress** | **Closeness** |
| --- | --- | --- | --- | --- | --- |
| Up | YWHAG | 312 | 0.080358 | 20739870 | 0.39199 |
| Up | ONECUT1 | 248 | 0.073787 | 12681958 | 0.348317 |
| Up | CALM2 | 239 | 0.054445 | 27966500 | 0.353624 |
| Up | ARRB1 | 237 | 0.05258 | 24431968 | 0.365367 |
| Up | PIK3R1 | 235 | 0.057099 | 18528726 | 0.364275 |
| Up | NEDD4L | 147 | 0.038297 | 9099884 | 0.352933 |
| Up | LNX1 | 144 | 0.038614 | 5691256 | 0.341987 |
| Up | YWHAH | 129 | 0.021765 | 6007304 | 0.371777 |
| Up | CHD3 | 128 | 0.022471 | 7248852 | 0.347448 |
| Up | RNF2 | 106 | 0.022563 | 6346178 | 0.342371 |
| Up | MAP1LC3A | 106 | 0.017339 | 6783766 | 0.340244 |
| Up | HDAC9 | 96 | 0.01637 | 4804226 | 0.327576 |
| Up | PRKCZ | 88 | 0.013827 | 4539492 | 0.354602 |
| Up | DLG4 | 85 | 0.017506 | 3951768 | 0.34134 |
| Up | PAK1 | 84 | 0.015444 | 4031114 | 0.355792 |
| Up | CRMP1 | 83 | 0.015685 | 4119654 | 0.341102 |
| Up | GABARAPL1 | 81 | 0.013928 | 3145142 | 0.339226 |
| Up | HRAS | 80 | 0.012326 | 3794030 | 0.341221 |
| Up | CCNE1 | 78 | 0.008458 | 2424696 | 0.356495 |
| Up | OPTN | 77 | 0.01595 | 3461266 | 0.355922 |
| Up | FBXW7 | 77 | 0.015395 | 2928630 | 0.335629 |
| Up | CDK5 | 73 | 0.011005 | 3409142 | 0.346879 |
| Up | MAPK9 | 71 | 0.014085 | 3206394 | 0.341939 |
| Up | PRKCD | 70 | 0.008341 | 3539246 | 0.344574 |
| Up | GNL3 | 68 | 0.009711 | 3706360 | 0.335629 |
| Up | GNB1 | 67 | 0.015549 | 2589912 | 0.35232 |
| Up | MYH10 | 66 | 0.006974 | 2475072 | 0.363162 |
| Up | DCTN1 | 65 | 0.009669 | 2867262 | 0.340482 |
| Up | VAMP2 | 59 | 0.010933 | 2513820 | 0.336928 |
| Up | UBE2V2 | 56 | 0.009484 | 2401056 | 0.333106 |
| Up | TPM3 | 55 | 0.007846 | 2198750 | 0.357174 |
| Up | GIT1 | 54 | 0.007005 | 1821126 | 0.337605 |
| Up | CBX6 | 53 | 0.010668 | 2260498 | 0.331542 |
| Up | PRKCB | 53 | 0.006411 | 1974986 | 0.344039 |
| Up | NLK | 50 | 0.008998 | 2067268 | 0.333425 |
| Up | EEF1A2 | 48 | 0.002674 | 1333340 | 0.340458 |
| Up | NDEL1 | 47 | 0.010049 | 1775038 | 0.33977 |
| Up | TRIM37 | 46 | 0.007178 | 2082066 | 0.33053 |
| Up | TRAF5 | 45 | 0.007372 | 1604276 | 0.328702 |
| Up | DLG3 | 41 | 0.004822 | 1155588 | 0.329904 |
| Up | BAP1 | 39 | 0.00766 | 1773400 | 0.329547 |
| Up | STX1A | 39 | 0.006772 | 1205634 | 0.305197 |
| Up | VBP1 | 39 | 0.006694 | 1447694 | 0.332197 |
| Up | MAP2 | 37 | 0.003696 | 1281772 | 0.338543 |
| Up | CYCS | 37 | 0.005487 | 1054270 | 0.353445 |
| Up | UQCRFS1 | 37 | 0.008354 | 1558902 | 0.328924 |
| Up | EXOSC6 | 35 | 0.007288 | 1544022 | 0.329324 |
| Up | MAFG | 33 | 0.005845 | 1033660 | 0.340292 |
| Up | NEK2 | 33 | 0.006289 | 1002156 | 0.334638 |
| Up | PLEKHA5 | 32 | 0.006236 | 1116192 | 0.32565 |
| Up | HPRT1 | 32 | 0.003689 | 979816 | 0.334799 |
| Up | SMS | 31 | 0.004366 | 1300152 | 0.327378 |
| Up | ARHGAP32 | 31 | 0.004972 | 1186650 | 0.35095 |
| Up | PTMS | 31 | 0.004524 | 1100852 | 0.333904 |
| Up | SUB1 | 31 | 0.003808 | 1068564 | 0.353035 |
| Up | DES | 31 | 0.002449 | 988558 | 0.33006 |
| Up | STMN1 | 31 | 0.004172 | 1129988 | 0.357384 |
| Up | GRIN2B | 30 | 0.003021 | 674728 | 0.335652 |
| Up | MYCBP2 | 30 | 0.004185 | 1104484 | 0.343191 |
| Up | MEF2C | 29 | 0.004727 | 1212946 | 0.329837 |
| Up | TIMM13 | 29 | 0.003577 | 895402 | 0.335976 |
| Up | CAMKK2 | 28 | 0.004309 | 944672 | 0.335329 |
| Up | SATB1 | 28 | 0.003115 | 839348 | 0.330755 |
| Up | THOC7 | 27 | 0.004582 | 594720 | 0.337068 |
| Up | MEF2A | 27 | 0.00343 | 864622 | 0.332651 |
| Up | RTF1 | 27 | 0.003788 | 734586 | 0.338425 |
| Up | LMO4 | 27 | 0.003835 | 750202 | 0.295932 |
| Up | CALM3 | 26 | 0.003525 | 635536 | 0.303223 |
| Up | POLR3A | 26 | 0.005561 | 912424 | 0.330038 |
| Up | DLG2 | 26 | 6.18E-04 | 176076 | 0.289567 |
| Up | ETV4 | 26 | 0.00393 | 869514 | 0.333698 |
| Up | CCNC | 26 | 0.002984 | 625896 | 0.33256 |
| Up | CDK5R1 | 26 | 0.002071 | 546148 | 0.348816 |
| Up | PHF7 | 26 | 0.004183 | 783584 | 0.328969 |
| Up | RBFOX1 | 25 | 0.006095 | 855366 | 0.324695 |
| Up | WASF1 | 23 | 0.003026 | 668148 | 0.324414 |
| Up | GAS7 | 22 | 0.00305 | 4356888 | 0.265743 |
| Up | MYO5A | 22 | 0.002932 | 582294 | 0.325889 |
| Up | MMP1 | 22 | 0.004015 | 552878 | 0.33179 |
| Up | BAG4 | 21 | 0.001171 | 519590 | 0.331092 |
| Up | AP1M2 | 20 | 0.00299 | 551822 | 0.327995 |
| Up | CALM1 | 20 | 0.002198 | 1057036 | 0.299588 |
| Up | PPP2R2C | 20 | 0.001728 | 520508 | 0.328039 |
| Up | BCL11A | 20 | 0.001558 | 523964 | 0.328836 |
| Up | TCEAL1 | 20 | 0.00361 | 703862 | 0.32394 |
| Up | HSPB3 | 19 | 0.003401 | 3235928 | 0.249182 |
| Up | MAP1A | 19 | 0.001885 | 352008 | 0.333333 |
| Up | CDC40 | 18 | 6.26E-04 | 202998 | 0.295914 |
| Up | NPAS2 | 18 | 0.001676 | 809118 | 0.290413 |
| Up | ELL2 | 18 | 0.003811 | 518438 | 0.324674 |
| Up | C7orf25 | 18 | 0.002191 | 1742862 | 0.268171 |
| Up | DCAF6 | 18 | 0.001649 | 480308 | 0.328769 |
| Up | CDK16 | 18 | 9.58E-04 | 352378 | 0.339604 |
| Up | NDUFB8 | 18 | 0.004373 | 617924 | 0.322867 |
| Up | GEMIN6 | 18 | 0.002556 | 578618 | 0.327136 |
| Up | PAK6 | 17 | 9.55E-04 | 415020 | 0.315347 |
| Up | NDUFA5 | 17 | 0.002104 | 568086 | 0.33179 |
| Up | DLGAP4 | 17 | 0.001667 | 329536 | 0.337511 |
| Up | GRIA2 | 17 | 0.001001 | 181580 | 0.283405 |
| Up | PPP3R1 | 17 | 0.002298 | 377112 | 0.330912 |
| Up | SEH1L | 17 | 0.00317 | 539506 | 0.325193 |
| Up | PPP6R1 | 16 | 0.002782 | 425364 | 0.324868 |
| Up | ATXN7L3 | 16 | 0.003742 | 1959898 | 0.259628 |
| Up | PTPN4 | 16 | 0.001114 | 239798 | 0.304911 |
| Up | ROBO2 | 16 | 0.001882 | 236458 | 0.285163 |
| Up | TRIO | 15 | 0.002094 | 403226 | 0.323531 |
| Up | DENR | 15 | 0.002351 | 446788 | 0.327334 |
| Up | ARL15 | 15 | 0.002365 | 458800 | 0.326195 |
| Up | PAX5 | 15 | 7.19E-04 | 179818 | 0.294253 |
| Up | STRBP | 15 | 0.001136 | 327550 | 0.324091 |
| Up | DLGAP3 | 15 | 2.02E-04 | 115732 | 0.313138 |
| Up | GRIN2A | 14 | 0.001121 | 214066 | 0.32928 |
| Up | ERC2 | 14 | 0.001471 | 228902 | 0.328702 |
| Up | PPFIBP1 | 14 | 0.001935 | 604474 | 0.343409 |
| Up | RALB | 14 | 0.001448 | 294676 | 0.325976 |
| Up | PPP3CB | 14 | 0.00158 | 381802 | 0.32762 |
| Up | BASP1 | 14 | 0.001024 | 292578 | 0.323703 |
| Up | LDB2 | 14 | 0.003643 | 428774 | 0.324565 |
| Up | PLCB1 | 13 | 0.001218 | 240180 | 0.323188 |
| Up | BRMS1L | 13 | 0.001919 | 348330 | 0.32435 |
| Up | PPFIA2 | 3 | 1.24E-06 | 936 | 0.261172 |
| Up | SYNGAP1 | 3 | 8.51E-05 | 15514 | 0.268555 |
| Up | PCLO | 2 | 0 | 0 | 0.252866 |
| Up | CNKSR2 | 2 | 4.63E-05 | 37846 | 0.288932 |
| Up | FBXO34 | 2 | 4.13E-05 | 8466 | 0.261312 |
| Up | KIF3B | 2 | 1.08E-04 | 13034 | 0.262226 |
| Up | DOCK3 | 2 | 9.20E-05 | 67144 | 0.276727 |
| Up | ATP2B2 | 2 | 1.50E-07 | 84 | 0.248889 |
| Up | STXBP5 | 2 | 8.07E-05 | 15654 | 0.270222 |
| Up | TBC1D9 | 2 | 0 | 0 | 0.255344 |
| Up | RASL11B | 2 | 1.64E-04 | 31094 | 0.271926 |
| Up | MARK1 | 2 | 0 | 0 | 0.283224 |
| Up | UNC13A | 1 | 0 | 0 | 0.247399 |
| Up | DOK6 | 1 | 0 | 0 | 0.260795 |
| Up | IFT57 | 1 | 0 | 0 | 0.250591 |
| Up | CCDC85A | 1 | 0 | 0 | 0.250746 |
| Up | PITPNB | 1 | 0 | 0 | 0.228365 |
| Up | NRGN | 1 | 0 | 0 | 0.261256 |
| Up | RGS6 | 1 | 0 | 0 | 0.260544 |
| Up | KCNJ3 | 1 | 0 | 0 | 0.260544 |
| Up | GNG3 | 1 | 0 | 0 | 0.260544 |
| Up | STX1B | 1 | 0 | 0 | 0.25203 |
| Up | CABP5 | 1 | 0 | 0 | 0.248648 |
| Up | GRIK1 | 1 | 0 | 0 | 0.25449 |
| Up | TIPIN | 1 | 0 | 0 | 0.244691 |
| Up | TCEAL4 | 1 | 0 | 0 | 0.244691 |
| Up | DZIP1 | 1 | 0 | 0 | 0.262509 |
| Up | ZMAT2 | 1 | 0 | 0 | 0.262509 |
| Up | TIMM8A | 1 | 0 | 0 | 0.251496 |
| Up | UPP2 | 1 | 0 | 0 | 0.278054 |
| Up | CHN1 | 1 | 0 | 0 | 0.260795 |
| Up | HTR2A | 1 | 0 | 0 | 0.25449 |
| Up | HIVEP2 | 1 | 0 | 0 | 0.28162 |
| Up | PTH2R | 1 | 0 | 0 | 0.230536 |
| Up | YPEL3 | 1 | 0 | 0 | 0.258348 |
| Up | FGF12 | 1 | 0 | 0 | 0.260879 |
| Up | CXADR | 1 | 0 | 0 | 0.25485 |
| Up | RASGRF1 | 1 | 0 | 0 | 0.254424 |
| Up | CPNE8 | 1 | 0 | 0 | 0.267611 |
| Up | DUSP19 | 1 | 0 | 0 | 0.254823 |
| Up | SMAP2 | 1 | 0 | 0 | 0.27126 |
| Up | ZC3HAV1L | 1 | 0 | 0 | 0.260879 |
| Up | LRRC7 | 1 | 0 | 0 | 0.25449 |
| Up | AGAP2 | 1 | 0 | 0 | 0.267025 |
| Up | GULP1 | 1 | 0 | 0 | 0.246573 |
| Up | PDZRN3 | 1 | 0 | 0 | 0.25485 |
| Down | CDK2 | 568 | 0.155446 | 85994106 | 0.400822 |
| Down | VCAM1 | 425 | 0.083407 | 64084048 | 0.372203 |
| Down | HLA-B | 281 | 0.053887 | 33590620 | 0.353393 |
| Down | VIM | 204 | 0.050439 | 14474410 | 0.385114 |
| Down | ERBB2 | 157 | 0.031343 | 11117020 | 0.352779 |
| Down | NFKB2 | 138 | 0.017676 | 11589816 | 0.347597 |
| Down | IRF1 | 131 | 0.028606 | 6421910 | 0.358277 |
| Down | HSPB1 | 100 | 0.017909 | 6161698 | 0.355792 |
| Down | TNF | 91 | 0.014206 | 5117754 | 0.351229 |
| Down | MYD88 | 87 | 0.013209 | 4540744 | 0.348317 |
| Down | B2M | 75 | 0.010701 | 2994394 | 0.351609 |
| Down | ANXA2 | 72 | 0.009198 | 3679156 | 0.366825 |
| Down | TNFAIP3 | 69 | 0.010169 | 3506054 | 0.347671 |
| Down | SOCS3 | 69 | 0.010894 | 3723712 | 0.338026 |
| Down | SERPINH1 | 68 | 0.011923 | 2502834 | 0.354241 |
| Down | TGFBR1 | 66 | 0.010649 | 3561476 | 0.340911 |
| Down | IFIT3 | 60 | 0.006561 | 4470398 | 0.311338 |
| Down | TLR4 | 58 | 0.010667 | 2976180 | 0.335513 |
| Down | CXCR4 | 58 | 0.006008 | 2359584 | 0.338896 |
| Down | TUBA1C | 58 | 0.004132 | 2003556 | 0.354731 |
| Down | CD44 | 56 | 0.008076 | 2543496 | 0.340078 |
| Down | ACTA2 | 55 | 0.0049 | 2465572 | 0.335698 |
| Down | MCM5 | 55 | 0.005496 | 1937950 | 0.346756 |
| Down | PHGDH | 54 | 0.007562 | 1906570 | 0.351127 |
| Down | ATF3 | 54 | 0.0067 | 2995218 | 0.337956 |
| Down | PTPRC | 53 | 0.007859 | 1715394 | 0.334271 |
| Down | DNAJB1 | 50 | 0.008161 | 2551374 | 0.3317 |
| Down | NFATC1 | 48 | 0.006789 | 1684078 | 0.316165 |
| Down | CASP1 | 48 | 0.008895 | 1893678 | 0.334362 |
| Down | HSPA6 | 48 | 0.003999 | 1666360 | 0.336532 |
| Down | PSTPIP1 | 47 | 0.005593 | 1632136 | 0.303241 |
| Down | REST | 44 | 0.007103 | 1528880 | 0.336347 |
| Down | ARPC1B | 42 | 0.007833 | 1565924 | 0.333584 |
| Down | RNF32 | 42 | 0.005646 | 861700 | 0.298049 |
| Down | MRPL53 | 42 | 0.006566 | 3058776 | 0.302058 |
| Down | FOXO1 | 42 | 0.005757 | 1735550 | 0.343942 |
| Down | PSMB8 | 42 | 0.003722 | 1161874 | 0.336045 |
| Down | BAG3 | 39 | 0.004679 | 1578076 | 0.333379 |
| Down | GZMB | 38 | 0.003784 | 1070570 | 0.313159 |
| Down | NKX3-1 | 37 | 0.005814 | 1210472 | 0.303846 |
| Down | ASF1B | 36 | 0.00558 | 1643552 | 0.33062 |
| Down | CLIC1 | 36 | 0.005479 | 1249758 | 0.3572 |
| Down | MAP3K8 | 35 | 0.00185 | 748800 | 0.3199 |
| Down | HLA-DRA | 35 | 0.00489 | 1401446 | 0.329859 |
| Down | RUNX3 | 35 | 0.004974 | 1303700 | 0.335906 |
| Down | ID3 | 34 | 0.007283 | 840502 | 0.346805 |
| Down | TAP1 | 33 | 0.003301 | 798494 | 0.33812 |
| Down | CDC45 | 33 | 0.003799 | 746868 | 0.345993 |
| Down | TJP2 | 32 | 0.003423 | 909330 | 0.339604 |
| Down | SERPINA1 | 32 | 0.007108 | 1453190 | 0.32908 |
| Down | GBP2 | 32 | 0.002521 | 1128260 | 0.290257 |
| Down | GFAP | 31 | 0.003316 | 922994 | 0.335906 |
| Down | SERPINE1 | 31 | 0.003828 | 1205968 | 0.333037 |
| Down | S100A4 | 31 | 0.004081 | 1133492 | 0.332674 |
| Down | SLC25A10 | 30 | 0.005214 | 855874 | 0.327312 |
| Down | EPHA2 | 30 | 0.003689 | 1013010 | 0.338402 |
| Down | CCL2 | 29 | 0.003625 | 1004306 | 0.303223 |
| Down | CDKN2C | 28 | 0.002649 | 1021296 | 0.330016 |
| Down | FES | 27 | 0.002506 | 758612 | 0.33866 |
| Down | GINS3 | 27 | 0.002772 | 899584 | 0.329792 |
| Down | IL16 | 26 | 0.003612 | 599576 | 0.298068 |
| Down | WWTR1 | 26 | 0.002872 | 750632 | 0.311398 |
| Down | CD82 | 25 | 0.003732 | 634690 | 0.33006 |
| Down | WEE1 | 25 | 0.001751 | 681834 | 0.33951 |
| Down | PLD2 | 25 | 0.002422 | 670852 | 0.334316 |
| Down | TNFSF10 | 24 | 0.003274 | 546918 | 0.317773 |
| Down | PSMB9 | 24 | 0.001896 | 492458 | 0.333539 |
| Down | LYZ | 23 | 0.002139 | 459788 | 0.346189 |
| Down | ITGB4 | 23 | 0.002592 | 851232 | 0.325585 |
| Down | HCLS1 | 22 | 0.001986 | 737812 | 0.295968 |
| Down | IFIH1 | 22 | 0.004031 | 770248 | 0.328415 |
| Down | HMOX1 | 22 | 0.002898 | 764808 | 0.332062 |
| Down | DTX3L | 22 | 0.002246 | 648958 | 0.331768 |
| Down | MASP1 | 21 | 0.002012 | 747346 | 0.291699 |
| Down | ELN | 21 | 0.004001 | 3772324 | 0.264288 |
| Down | SLC1A5 | 21 | 0.002255 | 455760 | 0.336718 |
| Down | CD14 | 20 | 0.003037 | 568446 | 0.286537 |
| Down | HBB | 20 | 0.003603 | 419390 | 0.345062 |
| Down | MYH11 | 19 | 9.34E-04 | 351046 | 0.332379 |
| Down | PRAM1 | 19 | 0.001189 | 395892 | 0.296743 |
| Down | ITGB7 | 19 | 0.002712 | 621542 | 0.327246 |
| Down | SPARC | 19 | 0.003714 | 2195696 | 0.274113 |
| Down | GINS2 | 19 | 0.003572 | 595884 | 0.328171 |
| Down | LTF | 18 | 0.001939 | 513758 | 0.327752 |
| Down | LTBR | 18 | 0.001624 | 326254 | 0.331836 |
| Down | RHOC | 18 | 0.002539 | 411212 | 0.348641 |
| Down | SERPINA3 | 18 | 0.002824 | 2141096 | 0.274082 |
| Down | HLA-DRB1 | 18 | 0.001464 | 523816 | 0.331903 |
| Down | GBP1 | 18 | 4.66E-04 | 182288 | 0.305542 |
| Down | STX11 | 18 | 0.002888 | 397430 | 0.308872 |
| Down | RORC | 18 | 0.002413 | 1228036 | 0.27487 |
| Down | HLA-C | 18 | 0.001494 | 302162 | 0.333242 |
| Down | LGALS9 | 17 | 0.001796 | 314052 | 0.290517 |
| Down | GEM | 17 | 0.003463 | 1959952 | 0.257339 |
| Down | S100A11 | 17 | 0.001522 | 372794 | 0.330598 |
| Down | IGF2 | 17 | 0.003761 | 276474 | 0.263773 |
| Down | IL12A | 17 | 0.001035 | 212762 | 0.297105 |
| Down | TFAP2B | 16 | 0.003689 | 575810 | 0.329369 |
| Down | HEYL | 16 | 0.002021 | 454578 | 0.328017 |
| Down | TRIM47 | 16 | 0.001291 | 353864 | 0.331159 |
| Down | VAT1 | 16 | 0.002697 | 295006 | 0.344015 |
| Down | HEY2 | 16 | 9.15E-04 | 287640 | 0.287094 |
| Down | TNFAIP8 | 15 | 0.002024 | 1480064 | 0.269624 |
| Down | TAP2 | 15 | 0.001276 | 231478 | 0.337979 |
| Down | DDR1 | 15 | 0.002006 | 470356 | 0.326151 |
| Down | HOMER3 | 15 | 0.002223 | 997268 | 0.285983 |
| Down | SELL | 15 | 0.001808 | 385340 | 0.32857 |
| Down | STON2 | 15 | 0.002692 | 342338 | 0.335329 |
| Down | TPD52L1 | 15 | 0.001586 | 626340 | 0.295304 |
| Down | IGFBP7 | 14 | 0.004442 | 507360 | 0.325042 |
| Down | FGF1 | 14 | 0.001364 | 302920 | 0.324998 |
| Down | FSTL1 | 14 | 0.003399 | 1917620 | 0.252565 |
| Down | IFI16 | 14 | 7.65E-04 | 302446 | 0.331204 |
| Down | MYOCD | 14 | 0.001188 | 362652 | 0.327004 |
| Down | ITGAL | 13 | 0.00191 | 267548 | 0.32977 |
| Down | ARHGEF5 | 13 | 0.001269 | 287418 | 0.334202 |
| Down | IER3 | 13 | 0.001613 | 280026 | 0.331994 |
| Down | SPHK1 | 13 | 0.001538 | 360498 | 0.327334 |
| Down | GNG12 | 13 | 0.001223 | 228742 | 0.324457 |
| Down | PALLD | 13 | 0.001554 | 224670 | 0.326785 |
| Down | TLR5 | 3 | 3.67E-05 | 14474 | 0.272032 |
| Down | SCNN1G | 3 | 6.60E-05 | 14234 | 0.265483 |
| Down | BGN | 2 | 8.48E-05 | 98378 | 0.260614 |
| Down | LILRB2 | 2 | 8.62E-06 | 3440 | 0.262325 |
| Down | CD74 | 2 | 6.01E-06 | 2700 | 0.255866 |
| Down | CXCL2 | 2 | 5.81E-05 | 6994 | 0.268407 |
| Down | ACP5 | 2 | 1.08E-05 | 3336 | 0.26326 |
| Down | ARRDC4 | 2 | 8.59E-05 | 41740 | 0.273145 |
| Down | COL3A1 | 2 | 1.40E-05 | 18796 | 0.247223 |
| Down | HLA-DMB | 2 | 0 | 0 | 0.250823 |
| Down | SIGLEC7 | 1 | 0 | 0 | 0.252644 |
| Down | LITAF | 1 | 0 | 0 | 0.259947 |
| Down | RFX4 | 1 | 0 | 0 | 0.248053 |
| Down | TIMP1 | 1 | 0 | 0 | 0.249144 |
| Down | OSMR | 1 | 0 | 0 | 0.260795 |
| Down | BATF2 | 1 | 0 | 0 | 0.249962 |
| Down | CXCL11 | 1 | 0 | 0 | 0.263787 |
| Down | IL21R | 1 | 0 | 0 | 0.263787 |
| Down | ISG20 | 1 | 0 | 0 | 0.263787 |
| Down | SLC12A3 | 1 | 0 | 0 | 0.249093 |
| Down | HNRNPA1L2 | 1 | 0 | 0 | 0.261593 |
| Down | HSPA1B | 1 | 0 | 0 | 0.257952 |
| Down | F11R | 1 | 0 | 0 | 0.26179 |
| Down | NLRC5 | 1 | 0 | 0 | 0.247235 |
| Down | BTN3A3 | 1 | 0 | 0 | 0.263787 |
| Down | VWA5A | 1 | 0 | 0 | 0.258348 |
| Down | SCD | 1 | 0 | 0 | 0.260879 |
| Down | FZD7 | 1 | 0 | 0 | 0.25449 |
| Down | HLA-DPB1 | 1 | 0 | 0 | 0.221898 |
| Down | CFI | 1 | 0 | 0 | 0.258348 |
| Down | PLA2G4B | 1 | 0 | 0 | 0.250591 |
| Down | PRF1 | 1 | 0 | 0 | 0.238489 |
| Down | CXCL3 | 1 | 0 | 0 | 0.258348 |
| Down | EFNA1 | 1 | 0 | 0 | 0.252853 |
| Down | AZGP1 | 1 | 0 | 0 | 0.28615 |
| Down | RRAD | 1 | 0 | 0 | 0.232682 |
| Down | GFRA1 | 1 | 0 | 0 | 0.252644 |
| Down | NPC2 | 1 | 0 | 0 | 0.260879 |
| Down | IFITM2 | 1 | 0 | 0 | 0.28615 |
| Down | HLA-DRB5 | 1 | 0 | 0 | 0.248053 |
| Down | HFE | 1 | 0 | 0 | 0.260155 |
| Down | PDLIM3 | 1 | 0 | 0 | 0.246311 |
| Down | CYBRD1 | 1 | 0 | 0 | 0.260879 |
| Down | FERMT3 | 1 | 0 | 0 | 0.27126 |
| Down | MUSTN1 | 1 | 0 | 0 | 0.25485 |
| Down | SYT2 | 1 | 0 | 0 | 0.251134 |
| Down | ATP2A3 | 1 | 0 | 0 | 0.28615 |
| Down | ELOVL1 | 1 | 0 | 0 | 0.258348 |
| Down | ACSS3 | 1 | 0 | 0 | 0.258348 |
| Down | FBLN5 | 1 | 0 | 0 | 0.20905 |

**Table 5** MiRNA - hub gene and TF – hub gene topology table

| **Regulation** | **Hub Genes** | **Degree** | **MicroRNA** | **Regulation** | **Hub Genes** | **Degree** | **TF** |
| --- | --- | --- | --- | --- | --- | --- | --- |
| Up | YWHAG | 441 | hsa-miR-548j-5p | Up | NEDD4L | 24 | PAX2 |
| Up | PIK3R1 | 406 | hsa-mir-466 | Up | HDAC9 | 19 | JUND |
| Up | CALM2 | 333 | hsa-miR-1911-5p | Up | PIK3R1 | 18 | EGR1 |
| Up | YWHAH | 325 | hsa-miR-142-3p | Up | MAP1LC3A | 14 | CREB1 |
| Up | NEDD4L | 309 | hsa-mir-376c-3p | Up | PRKCZ | 13 | HINFP |
| Up | CHD3 | 290 | hsa-miR-1304-5p | Up | LNX1 | 10 | NFYA |
| Up | RNF2 | 225 | hsa-mir-548am-3p | Up | YWHAG | 9 | ZNF354C |
| Up | PAK1 | 162 | hsa-mir-7-5p | Up | ONECUT1 | 8 | SREBF1 |
| Up | ARRB1 | 162 | hsa-mir-7106-5p | Up | CALM2 | 8 | HOXA5 |
| Up | HDAC9 | 121 | hsa-miR-342-3p | Up | ARRB1 | 8 | RUNX2 |
| Up | DLG4 | 108 | hsa-miR-431-3p | Up | PAK1 | 7 | REL |
| Up | PRKCZ | 96 | hsa-miR-128-3p | Up | CHD3 | 7 | STAT1 |
| Up | LNX1 | 86 | hsa-miR-18a-5p | Up | DLG4 | 6 | ESRRB |
| Up | ONECUT1 | 42 | hsa-mir-525-5p | Up | YWHAH | 5 | JUN |
| Up | MAP1LC3A | 27 | hsa-miR-376b-3p | Up | RNF2 | 4 | MEF2A |
| Down | TNFAIP3 | 361 | hsa-miR-523-5p | Down | TNF | 51 | FEV |
| Down | SERPINH1 | 348 | hsa-mir-6829-3p | Down | IRF1 | 17 | PPARG |
| Down | CDK2 | 338 | hsa-miR-34a-5p | Down | ERBB2 | 17 | TFAP2C |
| Down | VIM | 334 | hsa-mir-708-3p | Down | NFKB2 | 14 | GATA2 |
| Down | ERBB2 | 285 | hsa-miR-6891-3p | Down | CDK2 | 14 | TEAD1 |
| Down | B2M | 249 | hsa-miR-155-5p | Down | TNFAIP3 | 11 | USF1 |
| Down | IRF1 | 230 | hsa-miR-9-5p | Down | ANXA2 | 10 | PRRX2 |
| Down | HLA-B | 222 | hsa-miR-1587 | Down | HLA-B | 10 | FOXL1 |
| Down | VCAM1 | 208 | hsa-miR-302f | Down | HSPB1 | 9 | TP63 |
| Down | SOCS3 | 188 | hsa-mir-1287-5p | Down | VCAM1 | 9 | YY1 |
| Down | ANXA2 | 167 | hsa-mir-92a-1-5p | Down | MYD88 | 9 | SOX10 |
| Down | MYD88 | 133 | hsa-miR-19b-1-5p | Down | VIM | 9 | POU2F2 |
| Down | NFKB2 | 119 | hsa-miR-141-5p | Down | SOCS3 | 9 | ELK4 |
| Down | HSPB1 | 96 | hsa-mir-548f-3p | Down | SERPINH1 | 8 | NFKB1 |
| Down | TNF | 64 | hsa-miR-19a-3p | Down | B2M | 6 | BRCA1 |
